1 **Prevalence, complete genome and metabolic potentials of a phylogenetically novel**

2 **cyanobacterial symbiont in the coral-killing sponge, *Terpios hoshinota***

3 Running title: Dominant cyanobiont in *Terpios hoshinota*

4 Yu-Hsiang Chen<sup>1,2,3</sup>, Hsing-Ju Chen<sup>3</sup>, Cheng-Yu Yang<sup>3</sup>, Jia-Ho Shiu<sup>3</sup>, Daphne Z. Hoh<sup>3,4,5</sup>,

5 Pei-Wen Chiang<sup>3</sup>, Wenhua Savanna Chow<sup>3,4,5</sup>, Chaolun Allen Chen<sup>3,4</sup>, Tin-Han Shih<sup>3</sup>, Szu-

6 Hsien Lin<sup>3</sup>, Chi-Ming Yang<sup>3</sup>, James Davis Reimer<sup>6,7</sup>, Euichi Hirose<sup>6</sup>, Budhi Hascaryo

7 Iskandar<sup>8</sup>, Hui Huang<sup>9</sup>, Peter J. Schupp<sup>10</sup>, Chun Hong James Tan<sup>11,12</sup>, Hideyuki Yamashiro<sup>7</sup>,

8 Ming-Hui Liao<sup>3</sup>, Sen-Lin Tang<sup>2,3,4,5#</sup>

9

10 <sup>1</sup>Bioinformatics Program, Taiwan International Graduate Program, National Taiwan  
11 University, Taipei, Taiwan

12 <sup>2</sup>Bioinformatics Program, Institute of Information Science, Taiwan International Graduate  
13 Program, Academia Sinica, Taipei, Taiwan

14 <sup>3</sup>Biodiversity Research Center, Academia Sinica, Taipei, Taiwan

15 <sup>4</sup>Biodiversity Program, Taiwan International Graduate Program, Academia Sinica and  
16 National Taiwan Normal University, Taipei, Taiwan

17 <sup>5</sup>Department of Life Science, National Taiwan Normal University, Taipei, Taiwan

18 <sup>6</sup>Department of Chemistry, Biology and Marine Science, Faculty of Science, University of

19 the Ryukyus, Nishihara, Okinawa, Japan

20 <sup>7</sup>Tropical Biosphere Research Center, University of the Ryukyus, Nishihara, Okinawa,

21 Japan

22 <sup>8</sup>Department of Fishery Resources Utilization, Faculty of Fisheries and Marine Science,

23 Bogor Agricultural University, Bogor, Indonesia

24 <sup>9</sup>Tropical Marine Biological Research Station in Hainan, Chinese Academy of Sciences,

25 Sanya, China

26 <sup>10</sup>Institute of Chemistry and Biology of the Marine Environment, University of Oldenburg,

27 Wilhelmshaven, Germany

28 <sup>11</sup>Faculty of Science and Marine Environment, Universiti Malaysia Terengganu, Kuala

29 Nerus, Terengganu, Malaysia

30 <sup>12</sup>Institute of Oceanography and Environment, Universiti Malaysia Terengganu, Kuala

31 Nerus, Terengganu, Malaysia

32

33 Yu-Hsiang Chen and Hsing-Ju Chen contributed equally to this work. Author order was

34 determined on the basis of contribution.

35

36

37 # Corresponding author

38 Corresponding author information:

39 Dr. Sen-Lin Tang

40 Biodiversity Research Center, Academia Sinica

41 **E-mail:** [sltang@gate.sinica.edu.tw](mailto:sltang@gate.sinica.edu.tw)

42 Address: A305, Interdisciplinary Research Building for Science and Technology, 128

43 Academia Road, Sec. 2, Nankang, Taipei 11529, Taiwan.

44 Tel: +886-2-27893863

45 Fax: +886-2-27890844

46

47

48

49

50

51

52

53

54

## 55 **Abstract**

56 *Terpios hoshinota* is a ferocious, space-competing sponge that kills a variety of stony  
57 corals by overgrowth. Outbreaks of this species have led to intense coral reef damage and  
58 declines in living corals on the square kilometer scale in many geographical locations. Our  
59 large-scale 16S rRNA gene survey across three oceans revealed that the core microbiome  
60 of *T. hoshinota* included operational taxonomic units (OTUs) related to *Prochloron*,  
61 *Endozoicomonas*, *Pseudospirillum*, SAR116, *Magnetospira*, and *Ruegeria*. A *Prochloron*-  
62 related OTU was the most dominant cyanobacterium in *T. hoshinota* in the western Pacific  
63 Ocean, South China Sea, and Indian Ocean. The complete metagenome-assembled genome  
64 of the *Prochloron*-related cyanobacterium and our pigment analysis revealed that this  
65 bacterium had phycobiliproteins and phycobilins and lacked chlorophyll *b*, inconsistent  
66 with the iconic definition of *Prochloron*. Furthermore, the phylogenetic analyses based on  
67 16S rRNA genes and 120 single-copy genes demonstrated that the bacterium was  
68 phylogenetically distinct to *Prochloron*, strongly suggesting that it should be a sister taxon  
69 to *Prochloron*; we therefore proposed this symbiotic cyanobacterium as a novel species  
70 under a new genus: *Candidatus Paraprochloron terpiosii*. With the recovery of the complete  
71 genome, we characterized the metabolic potentials of the novel cyanobacterium in carbon  
72 and nitrogen cycling and proposed a model for the interaction between *Ca. Pp. terposii*

73 LD05 and *T. hoshinota*. In addition, comparative genomics analysis revealed that *Ca.*  
74 *Paraprochloron* and *Prochloron* showed distinct features in transporter systems and DNA  
75 replication.

76

## 77 **Importance**

78 The finding that one species predominates cyanobacteria in *T. hoshinota* from  
79 different geographic locations indicates that this sponge and *Ca. Pp. terpiosi* LD05 share a  
80 tight relationship. This study builds the foundation for *T. hoshinota*'s microbiome and  
81 paves a way for understanding the ecosystem, invasion mechanism, and causes of outbreak  
82 of this coral-killing sponge. Also, the first *Prochloron*-related complete genome enables us  
83 to study this bacterium with molecular approaches in the future and broadens our  
84 knowledge of the evolution of symbiotic cyanobacteria.

85

## 86 **Keywords:**

87 Cyanobacteria, Coral-killing sponge, *Terpios hoshinota*, Symbiont, Bacterial community.

88

89

90

## 91 **Introduction**

92       The coral-killing sponge, *Terpios hoshinota*, has received attention since its outbreaks  
93 were detected in several coral reefs in the western Pacific Ocean, South China Sea, and  
94 Indian Ocean (1-7). The encrusting sponge can kill various stony corals by overgrowth (8).  
95 It grows up to 23 mm per month (9), and its fast growing and competitive nature enables it  
96 to kill scleractinian corals quickly and at a high rate (30–80%) across biogeographic regions  
97 (4, 5, 7, 10). For instance, *T. hoshinota* overgrowth killed 30% of corals in some coral reefs  
98 of Green Island, Taiwan in just one year (2). Similarly, the sponge jeopardizes coral reefs  
99 in numerous regions of Indonesia, Malaysia, Japan, India, and the Great Barrier Reef (3,  
100 10-12). The gradual spread of *T. hoshinota* makes it a serious threat to coral reefs. However,  
101 little is known about what causes its outbreaks.

102       Sponges are commonly known to harbor complex microbial communities, and  
103 symbiotic microorganisms play vital roles in the development, health, and nutrient  
104 acquisition of their hosts (13). The microbe and host form an ecological unit called a  
105 holobiont. In *T. hoshinota*, the sponge associates with a bacterial community of relatively  
106 low diversity that is dominated by cyanobacteria (14). Ultrastructural observations have  
107 clearly shown that cyanobacteria are densely distributed in the sponge, contributing to 50%  
108 of the total cell volume (1, 14, 15). The blackish color of *T. hoshinota* is also attributed to

109 cyanobacteria (14). Accordingly, the sponge is called cyanobacteriosponge. Several studies  
110 have shown that cyanobacteria play important roles in the sponge's growth and competition  
111 with corals. For instance, high numbers of cyanobacteria can be observed in the sponge's  
112 larvae (16, 17), suggesting that they are transmitted vertically during embryogenesis in this  
113 particular sponge (18). Second, *in situ* light shading was shown to discontinue *T. hoshinota*  
114 expansion (19). Even short-term shading can cause a long-term decrease in the biomass of  
115 symbiotic cyanobacteria and lead to irreversible damage to *T. hoshinota* (20). Furthermore,  
116 one study found that, when *T. hoshinota* encountered certain corals, the sponge formed a  
117 hairy tip structure packed with dense cyanobacteria to interact with the corals (8). These  
118 results indicate that cyanobacteria are vital for its overgrowth of corals.

119        Though important, the identity of the symbiotic cyanobacteria is still unclear. In 2015,  
120 Yu *et al.* isolated and cultivated *Myxosarcina* sp. GII, a baeocytous cyanobacterium, from  
121 *T. hoshinota* at Green Island (21). However, electron microscopy has not identified  
122 vegetative cell aggregates of baeocyte, a type of reproductive cell, in *T. hoshinota* (14-16).  
123 Moreover, our previous study analyzed 16S ribosomal RNA gene sequences from Green  
124 Island and found that the dominant cyanobacterium in *T. hoshinota* is a novel species  
125 closely related to *Prochloron* sp. (14). *Prochloron*, a genus comprises of a single species,  
126 is an obligate symbiont of some ascidians; the hallmarks and definitions of this genus

127 include the present of chlorophyll *b* and the lack of phycobilins, which is unusual in  
128 cyanobacteria (15). However, a pigment analysis reported that the cyanobacteria in *T.*  
129 *hoshinota* contained phycobilins. Hence, the identity and characteristics of the predominant  
130 cyanobacterium in *T. hoshinota* remain uncertain, as does the question of whether the  
131 predominance of this particular cyanobacterium is present in all the Indo-Pacific regions.  
132 On the other hand, since cyanobacteria are attributed to the sponge's health and invasion  
133 capacity, the ecological relationship and molecular interaction between *T. hoshinota* and  
134 its cyanobacteria needs to be determined.

135       Other bacteria in the *T. hoshinota* microbiome also contribute to holobiont functions.  
136 Microbial community in sponge can be shaped by host-related factors, such as the immune  
137 system and nutrient exchanges (22, 23). Strict host selective pressure can stabilize the  
138 microbial community (24). On the other hand, the community can also be determined by  
139 environmental factors, such as light availability, pH, and temperature (22). Nevertheless,  
140 no study has investigated the microbiome of *T. hoshinota* under different biogeographical  
141 backgrounds. Hence, this study investigated the bacterial community *T. hoshinota* across  
142 different oceans to examine whether the bacterial community is stable or depends on  
143 geography.



144 Most sponge symbionts, including the dominant cyanobacteria in *T. hoshinota*, are  
145 uncultivable. Metagenomic methods can be used to determine the microbial composition  
146 in *T. hoshinota*, and knowing this composition will help us infer the ecosystem of the *T.*  
147 *hoshinota* holobiont. In this study, we conducted 16S rRNA gene survey to investigate the  
148 bacterial composition and diversity of *T. hoshinota* samples from a wide geographical range  
149 across the western Pacific Ocean, South China Sea, and Indian Ocean. Knowing the  
150 predominance of a cyanobacterium was ubiquitous, the complete genome of this  
151 cyanobacterium was reconstructed by whole-genome shotgun Nanopore and Illumina  
152 sequencing. The following genomic and comparative genomic analyses elucidated the  
153 phylogenetic affiliation and taxonomy of the dominant symbiotic bacterium in *T. hoshinota*  
154 and putative symbiotic interactions between the bacterium and the host.

155

## 156 **Results**

### 157 **Bacterial diversity in *Terpios hoshinota* samples from different oceans**

158 To characterize the bacterial communities in coral-encrusting *T. hoshinota* across  
159 different geographical backgrounds, samples were collected from 15 locations in the  
160 Pacific Ocean, South China Sea, and Indian Ocean (Table S1). 16S ribosomal RNA (rRNA)  
161 gene sequencing was used to determine the bacterial communities.

162 Statistical tests showed that operational taxonomic unit (OTU) Chao1 richness and  
163 Faith's phylogenetic diversity (PD) indices were not significantly associated with the  
164 oceanic regions from which the samples were collected (Chao1:  $p = 0.23$ , PD:  $p = 0.30$ )  
165 (Fig. S1a and S1b). In terms of Shannon diversity, the indices were also not significantly  
166 associated with the oceanic regions when the outliers were removed (Fig. S1c). Some  
167 samples—e.g., TWKT, MYRD, and MVFF samples—from the same locations showed  
168 high variation in Chao1 and Shannon indices. In contrast to the alpha diversity indices, the  
169 similarities in microbial composition were associated with sample origins (Fig. S2).  
170 PERMANOVA showed that samples from the same ocean were significantly more similar  
171 than those from different oceans (Bray Curtis: pseudo- $F = 5.13514$ ,  $p = 0.001$ , Unweighted  
172 UniFrac: pseudo- $F = 1.60401$ ,  $p = 0.01$ ). When relative abundances were taken into  
173 consideration, the effect of the sea on similarities increased (weighted UniFrac: pseudo- $F$   
174 =  $6.09022$ ,  $p = 0.001$ ).

175 ***Prochloron*-related bacterium dominated *T. hoshinota* bacterial communities across**  
176 **different oceans**

177 Totally we recovered 1,164 OTUs. Microbial composition analysis revealed that  
178 OTUs related to *Cyanobacteria* and *Proteobacteria* accounted for most of the bacterial  
179 composition across the samples, ranging from 81.5–97.4% (Fig. 1 and Fig. S3a).

180 *Bacteroidetes* and *Spirochaetae* were present across all the samples, though their  
181 abundances were only 0.34–6.29%. Genus-level analysis showed that a *Prochloron*-related  
182 OTU, referred as Prochl-OTU01, was dominant and present in all the samples (Fig. S3b  
183 and Table S2). Moreover, the *Prochloron*-related OTU accounted for most of the  
184 *Cyanobacteria* in the samples (Table S2).

185 Besides Prochl-OTU01, we also identified other core microbiome members, defined  
186 as OTUs that were present at least 90% of the samples. The OTUs of the core microbiome  
187 were related to *Endozoicomonas*, *Pseudospirillum*, SAR116, *Magnetospira*, and *Ruegeria*.  
188 Consistent with genus-level analysis, these genera were co-occurred across all the samples.  
189 This core microbiome averagely contributed 80% of bacterial abundance in each sample  
190 (Fig. S3b).

### 191 **Structure of symbiotic *Prochloron*-related bacteria in *T. hoshinota***

192 To reveal the detailed structure of the *Prochloron*-related bacteria, a *T. hoshinota*-  
193 encrusting abiotic substrate was observed using transmission electron microscopy and  
194 scanning electron microscopy (Fig. 2). The *T. hoshinota* sponge, roughly 500  $\mu\text{m}$  thick,  
195 were supported by the bundle of tylostyle spicules, and the spicules on the surface were  
196 interlaced (Fig. 2a-b). Inside the body, spherical bacterial cells 4–6  $\mu\text{m}$  in diameter were  
197 widely distributed, and cells were observed in various stages of cell division (Fig. 2c and

198 2f). A study published in 2015 isolated a baeocytous cyanobacterium, *Myxosarcina* sp.,  
199 from *T. hoshinota* (21). However, no vegetative cell aggregate of baeocytes could be  
200 observed in our results.

201 TEM results showed that these spherical cells contained thylakoids, typical  
202 compartments inside cyanobacteria, and the arrangements were parietal (Fig. 2d–f). In  
203 addition, carboxysomes were found; gas vesicles were absent in these cells, which is  
204 consistent with a previous description of *Prochloron*'s structure (25).

#### 205 **Genome assembly of a novel *Prochloron*-related species**

206 The predominance of a *Prochloron*-related OTU in *T. hoshinota* from various  
207 locations indicates the intimate association between bacterium and host. To reveal the  
208 identity and characteristics of the *Prochloron*-related bacterium, a *Prochloron*-related  
209 genome, referred as to LD05, was reconstructed by *de-novo* assembly of the metagenome  
210 from the sample at Green Island, Taiwan (Fig. 3). We used Nanopore sequencing and  
211 metaFlye, a cutting-edge long read metagenome assembler (26), to assemble metagenome  
212 and successfully recovered a single circular contig, which was annotated as  
213 cyanobacterium without any gap. The complete metagenome-assembled genome (MAG)  
214 was then polished with Illumina reads to obtain complete MAG with high accuracy. The

215 mapping coverage of Illumina reads was 99.98% of the MAG and the mean depth was 983  
216 times.

217 The complete MAG contained two copies of 16S and 23S rRNA gene sequences (Fig.  
218 3 and Table 1) and 46 tRNA genes; one of the 16S rRNA gene sequence was 100% identical  
219 to that of the predominant Prochl-OTU01 identified from the community survey. The  
220 analysis of the GTDB-Tk demonstrated that the LD05 MAG was closest to *Prochloron*  
221 *didemni*, but only with 77.97% average nucleotide identity (ANI).

222 Recently, a putative *Prochloron* species genome called SP5CPC1 was recovered from  
223 the metagenome of a sponge microbiome (27). The ANI analysis found that the LD05  
224 genome shared 93.18% identity with the SP5CPC1 genome, which is below the 95% ANI  
225 cutoff for species delineation (28). The LD05 shared a similar genome size, GC ratio, and  
226 coding density with SP5CPC1 (Table S3). On the other hand, *P. didemni* P2-P4 had a much  
227 larger genome and lower GC ratio and coding densities (Table S3). There was also a  
228 discrepancy between LD05 and *P. didemni* P2-P4 based on the average amino acid identity  
229 (AAI) and percentage of conserved proteins (POCP) analyses (Fig. S4). The LD05 shared  
230 91% AAI with SP5CPC1, but only 70% AAI with *P. didemni* P2-P4 genomes. On the other  
231 hand, the POCP between LD05 and *Prochloron* genomes ranged from 49.8–52%, close to  
232 a proposed 50% POCP cutoff for the genera delineation (29). Taken together, the LD05 and

233 SP5CPC1 genomes were different species, and both were more distantly related to *P.*  
234 *didemni*.

235 **Phylogenetic and functional genomic analyses revealed distinct characteristics of**  
236 **LD05 and SP5CPC1 genomes compared to other *Prochloron* genomes**

237 Although the LD05 and SP5CPC1 genomes had certain degrees of similarity to  
238 *Prochloron* genomes, the phylogenetic, genomic, and functional genomic analyses  
239 identified distinct characteristics between them and *Prochloron*, suggesting that they  
240 belong to a different genus.

241 A phylogenetic tree of 120 cyanobacteria was constructed based on 120 single-copy  
242 genes to determine phylogenetic affiliation (Fig. 4a and Fig. S5). The tree demonstrated that  
243 the LD05 and SP5CPC1 formed a clade that was sister to the clade containing *P. didemni*.  
244 The larger clade encompassing the two clades was adjacent to the clade containing  
245 *Synechocystis*, *Myxosarcina*, and other cyanobacteria. To provide an in-depth view,  
246 homologs of the LD05 16S rRNA gene with high similarities were retrieved from the NCBI  
247 database. A tree constructed by these 16S rRNA sequences depicted two distinct clades,  
248 referred as to Clade I and Clade II (Fig. 4b). Clade II contained 16S rRNA gene sequences  
249 from three genomes of *P. didemni* strains and other 16S rRNA sequences from various  
250 ascidians. In contrast, Clade I mainly comprised sequences from sponge holobionts,

251 including SP5CPC1, LD05, and 16S rRNA sequences from a variety of other sponges.  
252 Although many sequences in Clade I were assigned as *Synechocystis* and *Prochloron* 16S  
253 rRNA sequences, we found that they actually shared higher identities with the members of  
254 Clade I than *Synechocystis* or *Prochloron didemni*. Moreover, the genome phylogenomic  
255 analysis also revealed that the SP5CPC1 and LD05 are phylogenetically distant from  
256 cultivated *Synechocystis* (Fig. 4a).

257 To characterize the functional differences between the bacteria in the two clades,  
258 LD05, SP5CPC1, and *P. didemni* genomes were annotated with KEGG orthologs and  
259 clusters of orthologous groups (COGs). Complete-linkage clustering of COG category  
260 abundances demonstrated that the LD05 and SP5CPC1 were more functionally similar to  
261 *Microcystis* groups than to *P. didemni* (Fig. S6).

262 Two hallmarks of *Prochloron* are the presence of chlorophyll *b* and absence of  
263 phycobilins in the cell (30). However, a previous study showed that the symbiotic  
264 cyanobacteria in *T. hoshinota* had phycobilins based on microspectrophotometry results  
265 (15), which is consistent with our finding that phycobilins synthase and the  
266 phycobiliproteins genes were present in LD05 and SP5CPC1 genomes. The absence of the  
267 chlorophyll *b* synthase gene in LD05 and SP5CPC1 genomes implied that the bacteria  
268 lacked chlorophyll *b*. In addition, the failure to identify chlorophyll *b* in the ascidian

269 *Trididemnum nubilum* holobiont, which the PCR clone AO15 (DQ357958.1) in Clade I was  
270 recovered from, implied that the bacterium also lacks chlorophyll *b*. In accordance with the  
271 genomic analyses, our pigment analysis by LC-QTOF-MS also revealed the presence of  
272 chlorophyll *a* and absence of chlorophyll *b* in *T. hoshinota* (Fig. 5). These results indicated  
273 that the bacteria in Clade I had different light-harvesting systems from *Prochloron* in Clade  
274 II.

275 In summary, the results indicate that the LD05 and SP5CPC1 were derived from a  
276 common ancestor, phylogenetically different from the ancestor of *Prochloron*. More  
277 importantly, the bacteria have photosynthetic machinery distinct from that of *Prochloron*.  
278 The existence of phycobiliproteins and lack of chlorophyll *b*, inconsistent with the iconic  
279 definition of *Prochloron*. Therefore, we propose that the bacteria in Clades I and II be  
280 classified into two different genera and classify the species in Clade I as a novel genus  
281 “Paraprochloron”. Moreover, we classified LD05 as a novel species named *Candidatus*  
282 *Paraprochloron terpiosi* LD05 [Etymology: Gr. pref. *para-*, beside, alongside of; N.L. neut.  
283 n. *Prochloron*, a bacterial generic name; N.L. neut. n. *Paraprochloron*, a genus adjacent to  
284 *Prochloron*. N.L. gen. n. *terpiosi*, of *Terpios* a zoological scientific genus name.].

285

286 **Metabolic features of the novel species *Ca. Pp. terpiosi* LD05**



287 *Ca. Pp. terpiosi* LD05 possessed nearly all the genes required for photosynthesis,  
288 carbon fixation, the tricarboxylic acid cycle (TCA), and glycolysis (Fig. 6). In addition,  
289 genes related to sucrose metabolism—e.g., sucrose-6-phosphatase, sucrose synthase, and  
290 sucrose phosphorylase—were identified. These genes were also present in the SP5CPC1  
291 genome, but not in *P. didemni* genomes (Table S4). For light-harvesting systems, like  
292 typical cyanobacteria, the genes encoding phycobiliproteins—including phycoerythrin,  
293 phycocyanin, and allophycocyanin—were recovered, except for *cpcC*, *cpcD*, and *cpeE*  
294 (Table S4). Phycobilin synthase genes were also detected in the genomes. On the other  
295 hand, the genes encoding chlorophyll *a* synthesis were present, but the gene for chlorophyll  
296 *b* synthase was absent.

297 Certain symbiotic cyanobacteria contain nitrogen fixation machinery and provide  
298 their host with nitrogen sources (31). However, the *Ca. Pp. terpiosi* LD05 and SP5CPC1  
299 lacked nitrogen fixation genes. *Ca. Pp. terpiosi* LD05 had genes for nitrate uptake and  
300 assimilatory nitrate reduction pathways to convert nitrate into ammonium (Table S4). The  
301 glutamine synthetase/glutamate synthase (GS/GOGAT) pathway was also found in the  
302 genome, indicating that the ammonium derived from extracellular nitrate can be  
303 incorporated into amino acids by this pathway. Additionally, the genome also carried the  
304 complete gene set for the urea transporter and urease. The bacterium may take in the urea

305 from hosts and convert it into ammonium. More importantly, the general L-amino acid  
306 transporters can be identified in the genomes, which cannot be observed in *Prochloron*  
307 genomes. Hence, the bacteria may have multiple methods for obtaining nitrogen resources  
308 from their host and environment.

309 Many symbiotic bacteria in sponges have been shown to provide their hosts with  
310 cofactors and vitamins such as vitamin B<sub>12</sub> (cobalamin) (Table S4), which can only be  
311 synthesized by prokaryotic organisms (22). The *Ca. Pp. terpiosi* LD05 and SP5CPC1  
312 genome contained nearly complete gene sets for the synthesis pathways of vitamin B<sub>1</sub>  
313 (thiamine), vitamin B<sub>2</sub> (riboflavin), vitamin B<sub>7</sub> (biotin), and vitamin B<sub>12</sub>. The transporter  
314 for cobalt, a key constituent of vitamin B<sub>12</sub>, was also identified. In contrast, the  
315 *Prochloron* genomes lacked a cobalt transporter and many genes for vitamin B<sub>12</sub> synthesis.

316 Previous studies have discovered a variety of secondary metabolites from the *T.*  
317 *hoshinota* holobiont (32); these metabolites may be produced by symbiotic bacteria (33).  
318 Our analysis revealed the existence of four terpene synthesis clusters in *Ca. Pp. terpiosi*  
319 LD05, as well as SP5CPC1. Furthermore, the species also contains a gene encoding  
320 squalene cyclase, suggesting that the bacterium can produce cyclic triterpenes. Other  
321 secondary metabolite biosynthetic gene clusters were also recovered. The gene clusters

322 present in *Ca. Pp. terpiosi* LD05 included butyrolactone, linear azol(in)e-containing  
323 peptides, and non-ribosomal peptide synthetase clusters (Fig. 3).

### 324 **Symbiotic signatures and unique genomic features of *Ca. Pp. terpiosi* LD05**

325 The complete genome of *Ca. Pp. terpiosi* LD05 enables us to investigate the genome  
326 feature in a precise and comprehensive manner. When we compared the genomes with other  
327 phylogenetically close cyanobacteria, we found that the *Ca. Pp. terpiosi* LD05 and  
328 SP5CPC1 lacked *dnaA* gene, which encodes protein for replication initiation factor  
329 responsible for DNA unwinding at *oriC* (34). Previous studies mentioned that many of  
330 symbiotic cyanobacteria lacked *dnaA* gene and adopt DnaA-independent replication  
331 mechanisms, which may lead to multiple replicative origins and polyploidy (35, 36).  
332 Another interesting feature of *Ca. Pp. terpiosi* LD05 we found was that the bacteria had 50  
333 copies of RNA-directed DNA polymerase genes, which was not observed in other  
334 phylogenetically close cyanobacteria. However, the function of this feature needs to be  
335 determined.

336 Many symbiotic bacteria in sponge carry eukaryotic-like proteins (ELPs). The ELPs—  
337 e.g., leucine-rich repeat proteins (LRRs), ankyrin repeat proteins (ARPs), WD-40  
338 containing proteins (WD-40), and tetratricopeptide repeat proteins (TPRs)—may be used  
339 to interact with hosts during various biological processes. The genomic analysis

340 demonstrated that *Ca. Pp. terpios* LD05 carried these ELPs. However, some closely related  
341 free-living cyanobacteria also possess ELPs. On the other hand, the ELPs were highly  
342 enriched across *Prochloron* genomes.

343

## 344 **Discussion**

345 *T. hoshinota* is one of the most important biological threats to coral in the Indo-Pacific  
346 region. Its associated cyanobacteria and other symbiotic bacteria are essential for  
347 maintaining the sponge's function. Nevertheless, the present study is the first to explore  
348 the composition and role of *T. hoshinota*'s microbiome. Our unprecedented large-scale  
349 survey of the bacterial community in *T. hoshinota* based on 16S amplicon sequencing of  
350 samples from various regions across the western Pacific Ocean, Indian Ocean, and South  
351 China Sea enabled us to characterize the sponge's core microbiome.

352 We identified a bacterium, closely related to *Prochloron*, that was dominant across our  
353 sponge samples. The prevalence and predominance of this bacterium in *T. hoshinota*  
354 highlight the strong relationship between bacteria and their hosts. Combining Nanopore  
355 and Illumina sequencing, we recovered the complete bacterial genome with high accuracy,  
356 followed by phylogenetic and functional analyses, demonstrated that this cyanobacterium  
357 has a distinct phylogenetic affiliation and genomic and metabolic characteristics from

358 *Prochloron*, indicating that it belongs to a novel genus. We proposed a new genus,  
359 “Paraprochloron”, and refined the membership of *Prochloron*. Lastly, a functional analysis  
360 was performed to understand the lifestyle of this novel bacterium in the *T. hoshinota*  
361 holobiont. This study provides insights into the role of the cyanobacterium in *T. hoshinota*,  
362 which will facilitate future studies to investigate the ecosystem inside *T. hoshinota*, the  
363 causes of its outbreaks, and its invasion mechanism. Recovery of the complete bacterial  
364 genome will enable in-depth molecular approaches for identification of ecological  
365 functions of this cyanobacterium, and the sponge-cyanobacteria interactions

366

367 **Biogeographical variation in the *T. hoshinota* microbiome and its core microbial**  
368 **members**

369 The microbial community in sponges can be shaped by several environmental  
370 factors—e.g., light, nutrients, temperature, and pH—and may change in response to stress  
371 (23, 24, 37, 38). Environmental changes may force a sponge holobiont to alter its microbial  
372 community to acclimatize (39). On the other hand, host-related factors can also be  
373 important for determining community composition. For example, previous studies have  
374 shown that sponges have several immune receptors, such as NOD-like and Toll-like  
375 receptors (13). These receptors enable sponges to discriminate between symbionts and prey.

376 In order to live inside a sponge, microbes have to evade host immunity and phagocytosis  
377 (40, 41). Furthermore, metabolites and nutrients provided by hosts also contribute to the  
378 community structure (42). Some sponges show high stability in their microbiome due to  
379 strict selective pressures from their host. For instance, *Ircinia* and *Hexadella* sponges  
380 exhibit host-specific and stability in their associated bacterial communities, despite large  
381 geographic distances between sampling sites (24, 43). In contrast, certain sponges, such as  
382 *Petrosia ficiformis*, harbor biogeographical-dependent bacterial compositions (44).

383 Our survey of three oceans enabled us to determine whether bacterial communities  
384 vary across different biogeographical backgrounds and experience strong selective pressure  
385 from their host. Our dissimilarity analysis of the microbial composition of *T. hoshinota*  
386 showed a weak correlation between sample location and bacterial composition. The  
387 differences in microbial composition among *T. hoshinota* samples from different locations  
388 may result from local acclimatization. Samples from the same oceanic regions that share  
389 communities may equip their holobionts with similar metabolic functions to cope with  
390 stress or increase fitness in certain environments.

391 However, despite the biogeographical variation, we still identified core bacterial  
392 members that were present in all samples (Fig. S3). This core bacterial community  
393 comprised only a few genera, but accounted for ~80% of the community across all samples,

394 indicating that it is vital to the holobiont. Host-related factors may help keep this core  
395 microbiome stable because its members carry out core functions of the holobiont (23). The  
396 core members may contain the metabolic capability to utilize nutrients from the sponge  
397 host's environment and play important roles in nutrient exchanges, such as sulfur, carbon,  
398 and nitrogen cycling. This core group may be also responsible for defending against  
399 predators and protecting the sponge symbionts from toxins and pathogens (23).

400 The most dominant OTU in the core microbiome was closely related to *Prochloron*, a  
401 genus of symbiotic cyanobacteria found in various ascidians. The biogeographically-  
402 independent prevalence and predominance of this *Prochloron*-related bacterium in *T.*  
403 *hoshinota* suggest that it has a crucial role in the holobiont.

404 ***Candidatus* Paraprochloron terposi gen. nov., sp. nov., a *Prochloron*-related**  
405 **bacterium prevalent in *T. hoshinota***

406 Although the 16S rRNA gene of the *Prochloron*-related bacterium in *T. hoshinota* is  
407 phylogenetically close to that of *Prochloron*, deeper genomic, phylogenetic, and functional  
408 analyses, combined with the recent recovery of another symbiont *Prochloron*-related  
409 bacterial genome in the sponge, revealed that the two cyanobacteria are distinct, especially  
410 in terms of their pigment contents and phylogenetic divergence. Moreover, the pigment

411 features in these bacteria inconsistent with the definition of *Prochloron*. Hence, a new  
412 genus, “Paraprochloron”, was formally erected to distinguish these two groups.

413 Our 16S rRNA metagenomic analysis revealed that *Candidatus* Paraprochloron  
414 *terpiosi* LD05 is the most dominant cyanobacterium within *T. hoshinota* specimens  
415 collected across three different oceans. Why does the dominant cyanobacterium species  
416 remain identical in *T. hoshinota* samples across different oceans? The reason remains  
417 unclear. Recent studies suggest that *T. hoshinota* larvae, which carry vertically transmitted  
418 cyanobacteria, may have a short dispersal distances because they are more dense than the  
419 water, leading them to settle rapidly after leaving their mother sponge (16-18). In this  
420 circumstance, the symbiotic *Ca. Pp. terpiosi* LD05 from various locations might  
421 accumulate genetic differences to adapt to local environments. The absence of evident  
422 speciation in our study may be the result of the tight and stable symbiotic interactions  
423 between *Ca. Pp. terpiosi* LD05 and *T. hoshinota* restricting genetic changes in the  
424 bacterium. Another possibility is that the species becomes broadly dispersed through some  
425 other mechanism, such as via ocean currents or transportation via vessels; this would enable  
426 *T. hoshinota* larvae to spread quickly across the ocean with few genetic alterations.  
427 Evidence of recent *T. hoshinota* outbreaks support this latter scenario (2).

428 **Comparison between “Paraprochloron” and *Prochloron***



429 Comparative genomics between “Paraprochloron” and *Prochloron* enables us to infer  
430 their evolutionary histories and respective relationship to their host. Previous studies have  
431 shown that symbiotic bacteria usually have reduced genomes because certain genes erode  
432 as symbiosis develops (45, 46). Furthermore, a model of symbiont evolution has proposed  
433 that during the evolutionary history of symbiosis large-scale pseudogenization can happen  
434 during transitional events, such as a strict host association or vertical transmission, leading  
435 to a sudden drop in coding density (46). Eventually, the coding density gradually bounces  
436 back due to deletion bias.

437 Comparing *Prochloron* and “Paraprochloron”, we found that “Paraprochloron” had a  
438 smaller genome but similar coding density to other phylogenetically closely related  
439 cyanobacteria (Table S4). *Prochloron*, on the other hand, had a similar genome size but  
440 lower coding density. This difference may indicate that the transition toward the host-  
441 restricted lifestyles occurred more recently in *Prochloron* than “Paraprochloron”. The  
442 hypothesis can be supported by our observation that *Prochloron* harbored highly-enriched  
443 transposase genes as the elevation of mobile genetic element quantities, such as transposons  
444 and insertion sequences, is thought to be associated with the recent transition to a host-  
445 restricted symbiotic lifestyle (47).

446 Along with its unusual pigments, another hallmark of *Prochloron* is that it produces  
447 patellamides, cytotoxic cyclic peptides. However, the synthesis gene cluster cannot be  
448 found in *Ca. Pp. terpiosi* LD05 or SP5CPC1. On the contrary, the latter two genomes have  
449 four terpene synthesis gene clusters and contain genes that encode the protein that circulates  
450 terpene, but *Prochloron* genomes only harbor two terpene synthesis gene clusters. Hence,  
451 “Paraprochloron” and *Prochloron* may produce distinct secondary metabolites to increase  
452 the fitness of themselves or their entire holobiont.

453 Certain cyanobacteria contain genes for sucrose metabolism. Though the role of  
454 sucrose in cyanobacteria remains understudied, several articles have shown that sucrose  
455 can be utilized as a compatible solute, serve as signal molecule, or be used for glycogen  
456 synthesis (48-51). Interestingly, our genomic analysis found that the genes involved in  
457 sucrose metabolism were present in *Ca. Pp. terpiosi* LD05 and SP5CPC1 but absent in  
458 *Prochloron* (Table S4). We hypothesize that “Paraprochloron” can use sucrose as an  
459 osmolyte to cope with osmotic stress; this is supported by a previous finding that the genes  
460 related to osmotic stress are enriched in sponge-associated bacterial genomes (22). On the  
461 other hand, we also found that *Ca. Pp. terpiosi* LD05 and SP5CPC1 contained  
462 osmoprotectant transporter genes, which were not identified in *Prochloron* genomes (Table  
463 S4). These results indicate that the “Paraprochloron” species may live in environments with

464 higher osmotic stress, like places with high osmolarity or fluctuations in osmolarity,  
465 compared to *Prochloron*. Alternatively, “Paraprochloron” and *Prochloron* may use  
466 different strategies to deal with osmotic stress.

467 Another observation that drew our attention is the absence of *dnaA* gene in *Ca. Pp.*  
468 *terpiosi* LD05 and SP5CPC1. DnaA is required for the initiation of DNA replication at *oriC*  
469 (34). Some bacterial symbionts do not possess *dnaA* gene (36, 52, 53). Like mitochondria  
470 and chloroplasts, certain *dnaA*-lacking symbionts had multiple copies of the same genomes,  
471 leading to the increase in genome copy number in a single cell (35). The evolution of DnaA-  
472 independent replication was most studied in cyanobacteria. Many symbiotic cyanobacteria  
473 were found lacking *dnaA* gene. A recent study found that the deletion of the *dnaA* gene was  
474 not lethal in some free-living cyanobacteria, and deletion of the gene increased cell viability  
475 in stationary phase (36). Another study also indicated the cyanobacteria lost DnaA  
476 dependency before they become symbiosis, and the loss will drive the free-live bacteria to  
477 become symbiosis (35, 36). However, in our analysis, *Prochloron* has *dnaA*, but  
478 “Paraprochloron” does not, indicating the loss of *dnaA* happened after the two symbionts  
479 separate from the same ancestor. It implies that the symbiosis may also drive the bacteria  
480 to lose *dnaA*. However, the function of *dnaA*-independent replication in symbiosis still  
481 requires further experimentation.

482 The eukaryotic-like proteins (ELPs) are highly-enriched in *Prochloron* but not  
483 “Paraprochloron”. ELPs can be used to perform protein-protein interactions, phagocytosis  
484 evasion, host cell binding, and interference with the host ubiquitin system (54). ELPs are  
485 also thought to be necessary for sponge symbionts (8). The differences in ELP quantities  
486 between *Prochloron* and “Paraprochloron” may indicate that “Paraprochloron” uses an  
487 unidentified mechanism to interact with their hosts. Another possibility is that the long-  
488 term symbiotic history of “Paraprochloron” propelled bacteria to retain their essential ELPs  
489 and reduce unnecessary ones.

#### 490 **Symbiotic interactions between *Ca. Pp. terpios* and *T. hoshinota***

491 Sponges harbor complex bacterial communities (13), and the symbiotic bacteria play  
492 vital and diverse roles in the physiology and ecology of sponges. For instance, bacteria can  
493 provide their hosts with various nutrients and recycle waste. Moreover, symbiotic  
494 microorganisms can produce diverse secondary metabolites to compete with other  
495 holobionts or defend from invasion by predators. The predominance of *Ca. Pp. terpios*  
496 LD05 highlights its role in the *T. hoshinota* and the genome of *Ca. Pp. terpios* LD05  
497 enables us to understand its metabolic potential, the symbiotic relationship, and even how  
498 the holobiont overgrows corals.

499 Many sponges are mixotrophs and certain sponges can obtain carbon resources from  
500 cyanobacteria (55). Some sponges even acquire more than 50% of their energy demand  
501 from the symbiotic cyanobacteria in the form of photosynthates (56). Photosynthesis was  
502 observed in the *T. hoshinota* holobiont, and its efficiency increased when the coral-killing  
503 holobiont came into contact with coral; this mechanism may help sponges overgrow the  
504 coral (57). *Ca. Pp. terpiosi* LD05 is the only cyanobacterium in the core microbiome, and  
505 it has been found to have the genes needed for photosynthesis. Hence, the bacterium may  
506 be an important carbon source for *T. hoshinota* and facilitate competition with coral.

507 Ammonia secreted by sponges may serve as a nitrogen source for symbiotic bacteria.  
508 Our analysis identified ammonium transporters and the GS-GOGAT pathway in *Ca. Pp.*  
509 *terpiosi* LD05. Hence, the bacterium may recycle the ammonium from host. On the other  
510 hand, the bacterium harbors the urea transporter and urease. Therefore, urea can be used as  
511 an alternative nitrogen source. A previous study showed that the level of free amino acids  
512 in *T. hoshinota*-living cyanobacteria increased when the holobiont encountered coral. Our  
513 finding of an amino acid transporter in *Ca. Pp. Terpiosi* LD05 suggests that the bacterium  
514 may benefit from “coral killing” by leaching amino acids or ammonium that are released  
515 as the coral disintegrates.

516        Some microbes that live in sponges can store polyphosphate granules, which can  
517        account for 25–40% of the total phosphate content in sponge tissue (58, 59). These  
518        polyphosphate granules can be used for energy storage and may enable the holobiont to  
519        withstand periods of phosphate starvation. We found genes encoding polyphosphate kinase.  
520        Hence, *Ca. Pp. terpiosi* LD05 may play a pivotal role in phosphate storage and cycling in  
521        the *T. hoshinota* holobiont. A previous study demonstrated that the phosphate concentration  
522        in seawater was highly correlated with *T. hoshinota* overgrowth (60), highlighting the  
523        importance of phosphate in the spread of the *T. hoshinota* holobiont. Another study also  
524        proposed that *T. hoshinota* accumulates nutrients to compete with corals (8). We propose  
525        that *Ca. Pp. terpiosi* LD05 helps *T. hoshinota* outcompete corals by serving as a carbon and  
526        phosphate storage. However, how the phosphate concentration is correlated with *T.*  
527        *hoshinota* cover is unclear, as are details about phosphate cycling among the host, *Ca. Pp.*  
528        *terpiosi* LD05, and other symbiotic microbes.

529        Animals cannot synthesize essential vitamins, so symbiotic microorganisms are  
530        thought to be important sources of essential vitamins for sponges. Our analysis of the *Ca.*  
531        *Pp. terpiosi* LD05 genome identified the biosynthesis pathway for vitamin B<sub>1</sub>, vitamin B<sub>7</sub>,  
532        and vitamin B<sub>12</sub>. Thus, *Ca. Pp. terpiosi* LD05 may help maintain *T. hoshinota*'s health by  
533        providing the holobiont with vitamins.

534 One of the leading questions in the study of *T. hoshinota* is how it kills corals. Several  
535 mechanisms have been proposed. One argues that the sponge produces cytotoxic  
536 allelochemicals to damage coral cells (61). Another suggests that the sponge overgrows  
537 corals and competes with them for nutrients (8). Finally, the sponge may cause the coral's  
538 microbial composition to change, causing it to malfunction (62). These hypotheses are not  
539 mutually exclusive. For the first, several cytotoxic compounds, including nakiterpiosin,  
540 nakiterpiosinon, and terpiodiene, have been isolated from *T. hoshinota* holobionts (63, 64).  
541 Nakiterpiosin, and nakiterpiosinon are C-nor-D-homosteroids. Previous studies showed  
542 that cyanobacteria can produce sterols by the cyclization of squalene, a triterpene (65). In  
543 the *Ca. Pp. terposi* LD05 genome, the synthesis pathway of squalene and squalene cyclases  
544 were identified. Hence, the bacterium may be responsible for the production of the toxins.  
545 These toxins may facilitate overgrowing corals by damaging coral tissue directly or  
546 weakening the coral's defenses. In the future, the products of these gene clusters can be  
547 confirmed by molecular approaches.

548

## 549 **Conclusions**

550 This study makes several fundamental discoveries about the bacterial community  
551 associated with *T. hoshinota*. The core microbiome of *T. hoshinota* includes a *Prochloron*-

552 like bacterium, as well as *Endozoicomonas*, *Pseudospirillum*, SAR116, *Magnetospira*, and  
553 *Ruegeria*. Our finding that the dominant cyanobacteria in *T. hoshinota* is the same  
554 throughout the western Pacific Ocean, South China Sea, and Indian Ocean suggests that  
555 this particular cyanobacterium is the obligate symbiont of the sponge. The complete  
556 genome of this cyanobacterium was recovered, and the phylogenetic and genomic analyses  
557 revealed that the genome should be classified as a novel species under a new genus  
558 “Paraprochloron”, close to *Prochloron*. The complete genome enables us to understand the  
559 carbon and nitrogen metabolism of the bacterium, and the putative symbiotic interaction  
560 between the bacterium and *T. hoshinota*. By identifying the core microbiome and revealing  
561 the metabolic potential of the dominant cyanobacterium in *T. hoshinota*, our conclusions  
562 will help future studies explore the detailed ecosystem inside the holobiont, unveil how *Ca.*  
563 *Pp. terpios* LD05 contributes to the invasion and coral-killing nature of *T. hoshinota*, and  
564 determine the cause of the outbreaks in the future. Also, the complete genome we  
565 reconstructed will help us to extend our knowledge of cyanobacteria evolution and the  
566 functional diversity of symbiotic cyanobacteria.

567

568

569 **Materials and methods**



570 **Sample collection**

571 Sixty-one sponge samples, summarized in Supplementary table 1, were collected from  
572 15 coastal sites in the western Pacific Ocean, South China Sea, and Indian Ocean. The  
573 collection sites in the western Pacific Ocean included Okinoerabu (JPOKE), Bise (JPBS),  
574 Miyako (JPMYK), and Ishigaki (JPISG) in Japan, Lyudao (TWLD), Lanyu (TWLY), and  
575 Kenting (TWKT) in Taiwan, Guam (USGU) in the United State, and the Great Barrier Reef  
576 (AUGBR) in Australia. The collection sites in the South China Sea included Yongxing  
577 (CNYX) and Taiping (TWTP) in Taiwan, Redang (MYRD) in Malaysia, and Pari (IDPR).  
578 in Indonesia. Indian Ocean samples were collected from Faafu Atoll (MVFF) in the  
579 Maldives. Before DNA isolation, sponge tissue was collected with tweezer underwater and  
580 placed in Falcon 50 mL conical centrifuge tubes. Samples were then washed with 1 ml 1X  
581 TE buffer.

582 **DNA extraction**

583 For the sponge samples from JPBS, JPISG, JPMYK, JPOKE, TWLD, TWLY, and  
584 USGU, total DNA was extracted using a DNeasy Blood and Tissue kit (QIAGEN, Hilden,  
585 Germany) according to manufacturer's protocol. For the other samples, total DNA was  
586 extracted by a modified CTAB method described in our previous study (14). After DNA  
587 isolation, the DNA were stored at -80°C until subsequent experiments.

## 588 **16S rRNA gene amplification and multiplex tag sequencing**

589 High throughput sequencing of the 16S rRNA hypervariable V6–V8 region was used  
590 to characterize bacterial community diversity and composition. V6–V8 sequences were  
591 amplified by PCR with forward primer 5'-AACGCGAAGAACCTTAC-3' and reverse  
592 primer 5'-GACGGGCGGTGWGTRCA-3' (66). PCR mixtures contained 33.5 µL of  
593 sterilized distilled water, 0.5 µL of 5 U TaKaRa Ex Taq (Takara Bio, Otsu, Japan), 5 µL of  
594 10X Ex Taq buffer, 4 µL of 10 mM dNTP, 1 µL of each primer at a concentration of 10 µM,  
595 and 5 µL template DNA in a total volume of 50 µL. PCR was programmed with an initial  
596 step of 94°C for 5 min, 30 cycles of 94°C for 30 s, 52°C for 20 s, and 72°C for 30 s,  
597 followed by a final step of 72°C for 10 min. PCR was performed again to add barcodes to  
598 the amplicons. Each primer tag was designed with four extra nucleotides at the 5' end of  
599 both primers. Unique tags were used for PCR barcoding to label each sample in the study.  
600 PCR conditions were the same as that for the V6–V8 amplification, except that the number  
601 of reaction cycles was reduced to five. The products were purified by 1.5% agarose  
602 electrophoresis and QIAEX II Agarose Gel Extraction kit (QIAGEN, Hilden, Germany)  
603 according to manufacturer's instruction. The quality of the purified products was assessed  
604 using a Nanodrop spectrophotometer (Thermo Scientific, Vantaa, Finland).

## 605 **Illumina sequencing and community analysis**

606 DNA concentration was measured by a Quant-iT™ assay (Thermo Fisher Scientific,  
607 USA). Equal pools of DNA were sent to Yourgene Bioscience (Taipei, Taiwan) and  
608 sequenced using the MiSeq platform (Illumina, USA). Short and low-quality reads were  
609 filtered by Mothur v.1.38.1 (67) to retain reads with an average quality score > 27 and  
610 lengths of 365–451 base pairs (bp). Reads with homopolymer > 8 bp were excluded, and  
611 chimera sequences from all samples were removed by USEARCH v8.1.1861 (68). OTUs  
612 were determined and classified using the UPARSE pipeline (69) with reference to the Silva  
613 v128 database (70). OTUs were defined using a 97% similarity threshold. OTUs assigned  
614 to Archaea, Eukaryota, chloroplast, and mitochondria were removed.

615 Alpha and beta diversity indices were determined by QIIME 2 v2020.6 (71). Alpha  
616 diversity indices were calculated by Shannon diversity, Chao1 richness estimator, and  
617 Faith's phylogenetic diversity. Dissimilarities in microbial community compositions among  
618 samples were computed using Bray–Curtis distance dissimilarity, unweighted UniFrac, and  
619 weighted UniFrac. The results were visualized by principal component analysis (PCA) and  
620 dendrogram.

## 621 **Electron microscopy**

622 *T. hoshinota* samples at the sponge-coral border were collected by transmission  
623 electron microscopy (TEM), and *T. hoshinota* was observed on rubber by scanning electron

624 microscopy. Samples were prepared as described in our previous study (14). They were  
625 fixed in 0.1 M phosphate buffer with 2.5% glutaraldehyde and 4% paraformaldehyde. The  
626 samples were then washed with 0.1 M phosphate buffer for 15 min three times, then  
627 immersed in 0.1 M phosphate buffer with 1% osmium tetroxide for 4 hr. After being washed  
628 again three times, the samples for TEM were sequentially dehydrated in acetone at 30%,  
629 50%, 70%, 85%, 95%, and 100% for 20 min each time. After being dehydrated, the samples  
630 were embedded in Spurr's resin and sectioned. The sections were stained with 5% uranyl  
631 acetate in methanone and 0.5% lead citrate. The stained samples were observed under a  
632 Philips CM-100 TEM. Samples for SEM were sequentially dehydrated in 30% for 1 hr,  
633 50% for 1 hr 70% for 1 hr, 85% for 2 hr, 95% for 2 hr, 100% for 2 hr, and 100% for 12 hr.  
634 The samples were dried in a Hitachi HCP-2, then gold coated with a Hitachi E-1010 and  
635 observed under an FEI Quanta 200 SEM.

#### 636 **Pigment analysis by UPLC-QTOF-MS**

637       Approximately 2.5 g of wet *T. hoshinota* tissue from each sample was centrifuged at  
638 7,000 rpm for 30 s to remove excess water. Sponge tissues were placed in mortars and  
639 ground with 4 ml of 100% acetone to homogenize the tissues. The homogeneous samples  
640 were transferred into a 5 ml centrifuge tube and centrifuged at 7000 rpm at room  
641 temperature for 30 s. The supernatant was transferred into a new 5-ml centrifuge tube. The

642 samples were covered with aluminum foil paper for being shaded and stored at 4°C until  
643 pigment analysis.

644 Pigment content analysis was performed by UPLC-MS. The UPLC-MS system used  
645 the Agilent 1290 Infinity II ultra-performance liquid chromatography (UPLC) system  
646 (Agilent Technologies, Palo Alto, CA, USA) coupled online to the Dual AJS electrospray  
647 ionization (ESI) source of an Agilent 6545 quadrupole time-of-flight (Q-TOF) mass  
648 spectrometer (Agilent Technologies, Palo Alto, CA, USA). The samples were separated  
649 using a Kinetex XB-C18 column (2.6 µm, 4.6 × 100 mm, Phenomenex, Torrance, CA, USA)  
650 at 40°C. The chromatogram was acquired; mass spectral peaks were detected and their  
651 waveform processed using Agilent Qualitative Analysis 10.0 software (Agilent, USA).

## 652 **Metagenome sequencing and assembly**

653 Nanopore and Illumina sequencing were used to recover metagenome-assembled  
654 genomes (MAGs) with high accuracy. For Illumina sequencing, *T. hoshinota* tissue was  
655 ground, and the samples were filtered through a 0.35 µm membrane.  $1 \times 10^8$  cyanobacterial  
656 cells were purified from the samples using the MoFlo XDP cell sorter based on  
657 fluorescence and forward scatter intensity. The cells were then retained on a 0.2-µm  
658 cellulose acetate membrane filter, and the DNA was extracted by CTAB method mentioned  
659 above. Purified DNA was sent to Yourgene Bioscience (Taipei, Taiwan) and sequenced on

660 a MiSeq platform (Illumina, USA).

661 For Nanopore sequencing. *T. hoshinota* larvae were collected into a Falcon 50 mL  
662 conical centrifuge tube with a dropper underwater. The larvae were then selected into a  
663 Petri dish using a microscope to remove contamination, and the larvae were then fixed with  
664 absolute ethanol and stored at -20°C until DNA extraction. The total DNA was extracted  
665 by a modified CTAB method mentioned above. After DNA extraction, the DNA was sent  
666 to NGS Core at Biodiversity Research Center, Academia Sinica for Nanopore sequencing.

667 To recover cyanobacterial genome from the metagenome, Nanopore reads were  
668 assembled by metaFlye with default settings (26). One contig was annotated as circular by  
669 metaFlye, and it was assigned as novel cyanobacterial species by GTDB-TK taxonomy  
670 annotation (72). Because Nanopore reads are error-prone, the genome was polished by  
671 Illumina reads in order to increase the accuracy of the genome. First, Illumina reads were  
672 trimmed and filtered by trimmomatic v0.39 with the following parameters:  
673 ILLUMINACLIP:TruSeq3-PE-2.fa:2:30:10:3: TRUE LEADING:10 TRAILING:10  
674 SLIDINGWINDOW:5:15 MINLEN:50 (73). The processed reads were mapped to the  
675 cyanobacterial contig, and the contig was then polished with Pilon by the mapping result  
676 (74).

677 **Genome annotation**

678 The genome of *Prochloron*, “Paraprochloron”, and phylogenetically close  
679 cyanobacteria were annotated using Prokka v1.13.7 with the ‘usegenus’ and ‘rfam’ options  
680 (75). The genomes were also annotated with KEGG functional orthologs (KO numbers)  
681 and COGs (76, 77). To annotate the KO numbers, protein sequences predicted by Prodigal  
682 were blasted against the KEGG database using BlastKoala and enrichM (78-80). The K  
683 number annotation results were then used to reconstruct the transporter systems and  
684 metabolic pathways using KEGG mapper (81). To annotate COGs, the predicted protein  
685 sequences were searched against the COG database by PSI-BLAST with an e-value  
686 threshold of  $10^{-5}$  (82). In addition, the transporter proteins were identified by searching the  
687 putative protein sequences against TransportDB 2.0 (August 2019) using BLASTp (83).

#### 688 **Phylogenetic analysis**

689 To reconstruct a phylogenetic tree of the 16S rRNA genes, the sequences with high  
690 identities to the 16S rRNA gene in LD05 genome were retrieved by searching the NCBI nt  
691 database using BLASTn (82, 84). The sequences were aligned by MUSCLE on MEGA7  
692 (85, 86). A tree was then reconstructed using IQ-TREE v2.03 using automatic model  
693 selection and 1,000 bootstraps (87). The tree was visualized with iTOL v4 (88).

694 Genomes for each cyanobacteria species in GTDB database were downloaded and  
695 120 single-copy gene protein sequences were used to reconstruct a tree (89). Marker gene  
696 protein sequences were identified, aligned, and concatenated by GTDB-TK v1.3.0 (72). A  
697 phylogenomic tree was then built using IQ-TREE v2.03 with automatic model selection

698 and 1,000 Ultrafast bootstraps. The tree was visualized with iTOL v4 (87, 88).

#### 699 **Availability of data and materials**

700 All the raw data and genome were submitted under BioProject ID: PRJNA665642.

701

#### 702 **Acknowledgements**

703 Y.H.C acknowledges the Taiwan International Graduate Program (TIGP) for its fellowship

704 towards his graduate studies. We thank Noah Last of Draft Editing for his English language

705 editing, Dr. Ker-yea Soong and Shih-Shou Fang for collecting *T. hoshinota* samples, and

706 the Green Island Marine Research Station for supporting the research. We thank the

707 electron microscope and flow cytometry divisions of IPMB, Academia Sinica for their

708 technical support and Chih-Yu Lin and Gong-Min Lin in the Metabolomics Core Facility,

709 Agricultural Biotechnology Research Center, Academia Sinica for the technical support

710 and for performing the UPLC-MS/MS analysis and processing data.

711

#### 712 **Competing interests**

713 The authors declare that they have no competing interests.

714

#### 715 **Funding**



716 This work was funded by Biodiversity Research Center, Academia Sinica and the

717 National Science Council, Taiwan (NSC98-2321-B-001-025-MY3678106).

718

719 **Authors' contributions:**

720 YHC, HJC, and SLT designed the study and prepared the manuscript. YHC and HJC

721 analyzed and interpreted the data. HJC, CYC, JHS, DZH, PWC, MHL, and WSC collected

722 and sequenced the samples. HJC, CYC, and JHS observed the electron microscopy. HJC,

723 THS, SHL, and CMY examined the pigments. CAC, JDR, EH, BHI, HH, PJS, CHJT, and

724 HY assisted with the sampling.

725 All authors read and approved the manuscript.

726

727 **References**

728 1. Rützler K, Muzik K. 1993. *Terpios hoshinota*, a new cyanobacteriosponge  
729 threatening Pacific reefs. Recent advances in systematics and ecology of sponges  
730 *Scientia Marina*.

731 2. Liao M-H, Tang S-L, Hsu C-M, Wen K-C, Wu H, Chen W-M, Wang J-T, Meng P-J, Twan  
732 W-H, Lu C-K. 2007. The "Black Disease" of Reef-Building Corals at Green Island,  
733 Taiwan-Outbreak of a Cyanobacteriosponge. *Terpios hoshinota* (Suberitidae;  
734 Hadromerida). *ZOOLOGICAL STUDIES-TAIPEI*- 46:520.

735 3. Fujii T, Keshavmurthy S, Zhou W, Hirose E, Chen C, Reimer J. 2011. Coral-killing  
736 cyanobacteriosponge (*Terpios hoshinota*) on the Great Barrier Reef. *Coral Reefs*  
737 30:483-483.

738 4. de Voogd NJ, Cleary DFR, Dekker F. 2013. The coral-killing sponge *Terpios hoshinota*  
739 invades Indonesia. *Coral Reefs* 32:755-755.

- 740 5. Hoeksema BW, Waheed Z, de Voogd NJ. 2014. Partial mortality in corals overgrown  
741 by the sponge *Terpios hoshinota* at Tioman Island, Peninsular Malaysia (South  
742 China Sea). *Bulletin of Marine Science* 90:989-990.
- 743 6. Thinesh T, Jose PA, Hassan S, Selvan KM, Selvin J. 2015. Intrusion of coral-killing  
744 sponge (*Terpios hoshinota*) on the reef of Palk Bay. *Current Science* 109:1030-1032.
- 745 7. Montano S, Chou WH, Chen CA, Galli P, Reimer JD. 2015. First record of the coral-  
746 killing sponge *Terpios hoshinota* in the Maldives and Indian Ocean. *Bulletin of*  
747 *Marine Science* 91:97-98.
- 748 8. Wang JT, Chen YY, Meng PJ, Sune YH, Hsu CM, Wei KY, Chen CA. 2012. Diverse  
749 Interactions between Corals and the Coral-Killing Sponge, *Terpios hoshinota*  
750 (*Suberitidae*: *Hadromerida*). *Zoological Studies* 51:150-159.
- 751 9. Plucerrosario G. 1987. The Effect of Substratum on the Growth of *Terpios*, an  
752 Encrusting Sponge Which Kills Corals. *Coral Reefs* 5:197-200.
- 753 10. Yomogida M, Mizuyama M, Kubomura T, Reimer JD. 2017. Disappearance and  
754 Return of an Outbreak of the Coral-killing Cyanobacteriosponge *Terpios hoshinota*  
755 in Southern Japan. *Zoological Studies* 56.
- 756 11. Shi Q, Liu G, Yan HQ, Zhang HL. 2012. Black Disease (*Terpios hoshinota*): A Probable  
757 Cause for the Rapid Coral Mortality at the Northern Reef of Yongxing Island in the  
758 South China Sea. *Ambio* 41:446-455.
- 759 12. Madduppa H, Schupp PJ, Faisal MR, Sastria MY, Thoms C. 2017. Persistent  
760 outbreaks of the "black disease" sponge *Terpios hoshinota* in Indonesian coral  
761 reefs. *Marine Biodiversity* 47:149-151.
- 762 13. Hentschel U, Piel J, Degnan SM, Taylor MW. 2012. Genomic insights into the marine  
763 sponge microbiome. *Nature Reviews Microbiology* 10:641-U75.
- 764 14. Tang SL, Hong MJ, Liao MH, Jane WN, Chiang PW, Chen CB, Chen CA. 2011. Bacteria  
765 associated with an encrusting sponge (*Terpios hoshinota*) and the corals partially  
766 covered by the sponge. *Environmental Microbiology* 13:1179-1191.
- 767 15. Hirose E, Murakami A. 2011. Microscopic anatomy and pigment characterization  
768 of coral-encrusting black sponge with cyanobacterial symbiont, *Terpios hoshinota*.  
769 *Zoolog Sci* 28:199-205.
- 770 16. Wang JT, Hirose E, Hsu CM, Chen YY, Meng PJ, Chen CA. 2012. A Coral-Killing Sponge,  
771 *Terpios hoshinota*, Releases Larvae Harboring Cyanobacterial Symbionts: An  
772 Implication of Dispersal. *Zoological Studies* 51:314-320.
- 773 17. Hsu CM, Wang JT, Chen CA. 2013. Larval release and rapid settlement of the coral-  
774 killing sponge, *Terpios hoshinota*, at Green Island, Taiwan. *Marine Biodiversity*  
775 43:259-260.

- 776 18. Nozawa Y, Huang YS, Hirose E. 2016. Seasonality and lunar periodicity in the sexual  
777 reproduction of the coral-killing sponge, *Terpios hoshinota*. *Coral Reefs* 35:1071-  
778 1081.
- 779 19. Soong K, Yang SL, Chen CA. 2009. A Novel Dispersal Mechanism of a Coral-  
780 Threatening Sponge, *Terpios hoshinota* (Suberitidae, Porifera). *Zoological Studies*  
781 48:596-596.
- 782 20. Thinesh T, Meenatchi R, Pasiyappazham R, Jose PA, Selvan M, Kiran GS, Selvin J.  
783 2017. Short-term in situ shading effectively mitigates linear progression of coral-  
784 killing sponge *Terpios hoshinota*. *Plos One* 12.
- 785 21. Yu CH, Lu CK, Su HM, Chiang TY, Hwang CC, Liu T, Chen YM. 2015. Draft genome of  
786 *Myxosarcina* sp. strain GI1, a baeocytous cyanobacterium associated with the  
787 marine sponge *Terpios hoshinota*. *Stand Genomic Sci* 10:28.
- 788 22. Webster NS, Thomas T. 2016. The Sponge Hologenome. *mBio* 7:e00135-16.
- 789 23. Pita L, Rix L, Slaby BM, Franke A, Hentschel U. 2018. The sponge holobiont in a  
790 changing ocean: from microbes to ecosystems. *Microbiome* 6:46.
- 791 24. Pita L, Turon X, Lopez-Legentil S, Erwin PM. 2013. Host rules: spatial stability of  
792 bacterial communities associated with marine sponges (*Ircinia* spp.) in the  
793 Western Mediterranean Sea. *FEMS Microbiol Ecol* 86:268-76.
- 794 25. Whatley JM. 1977. The fine structure of *Prochloron*. *New Phytologist* 79:309-313.
- 795 26. Kolmogorov M, Bickhart DM, Behsaz B, Gurevich A, Rayko M, Shin SB, Kuhn K, Yuan  
796 J, Polevikov E, Smith TPL, Pevzner PA. 2020. metaFlye: scalable long-read  
797 metagenome assembly using repeat graphs. *Nat Methods* 17:1103-1110.
- 798 27. Podell S, Blanton JM, Oliver A, Schorn MA, Agarwal V, Biggs JS, Moore BS, Allen EE.  
799 2020. A genomic view of trophic and metabolic diversity in clade-specific  
800 *Lamellodysidea* sponge microbiomes. *Microbiome* 8:97.
- 801 28. Richter M, Rossello-Mora R. 2009. Shifting the genomic gold standard for the  
802 prokaryotic species definition. *Proc Natl Acad Sci U S A* 106:19126-31.
- 803 29. Qin QL, Xie BB, Zhang XY, Chen XL, Zhou BC, Zhou J, Oren A, Zhang YZ. 2014. A  
804 proposed genus boundary for the prokaryotes based on genomic insights. *J*  
805 *Bacteriol* 196:2210-5.
- 806 30. Kuhl M, Behrendt L, Trampe E, Qvortrup K, Schreiber U, Borisov SM, Klimant I,  
807 Larkum AW. 2012. Microenvironmental Ecology of the Chlorophyll b-Containing  
808 Symbiotic Cyanobacterium *Prochloron* in the Didemnid Ascidian *Lissoclinum*  
809 *patella*. *Front Microbiol* 3:402.
- 810 31. Harding K, Turk-Kubo KA, Sipler RE, Mills MM, Bronk DA, Zehr JP. 2018. Symbiotic  
811 unicellular cyanobacteria fix nitrogen in the Arctic Ocean. *Proc Natl Acad Sci U S A*

- 812 115:13371-13375.
- 813 32. Mehbub MF, Perkins MV, Zhang W, Franco CMM. 2016. New marine natural  
814 products from sponges (Porifera) of the order Dictyoceratida (2001 to 2012); a  
815 promising source for drug discovery, exploration and future prospects. *Biotechnol*  
816 *Adv* 34:473-491.
- 817 33. Schorn MA, Jordan PA, Podell S, Blanton JM, Agarwal V, Biggs JS, Allen EE, Moore  
818 BS. 2019. Comparative Genomics of Cyanobacterial Symbionts Reveals Distinct,  
819 Specialized Metabolism in Tropical Dysideidae Sponges. *mBio* 10.
- 820 34. Katayama T, Ozaki S, Keyamura K, Fujimitsu K. 2010. Regulation of the replication  
821 cycle: conserved and diverse regulatory systems for DnaA and oriC. *Nat Rev*  
822 *Microbiol* 8:163-70.
- 823 35. Ohbayashi R, Hirooka S, Onuma R, Kanesaki Y, Hirose Y, Kobayashi Y, Fujiwara T,  
824 Furusawa C, Miyagishima SY. 2020. Evolutionary Changes in DnaA-Dependent  
825 Chromosomal Replication in Cyanobacteria. *Front Microbiol* 11:786.
- 826 36. Ohbayashi R, Watanabe S, Ehira S, Kanesaki Y, Chibazakura T, Yoshikawa H. 2016.  
827 Diversification of DnaA dependency for DNA replication in cyanobacterial  
828 evolution. *ISME J* 10:1113-21.
- 829 37. Lesser MP, Fiore C, Slattery M, Zaneveld J. 2016. Climate change stressors  
830 destabilize the microbiome of the Caribbean barrel sponge, *Xestospongia muta*.  
831 *Journal of Experimental Marine Biology and Ecology* 475:11-18.
- 832 38. Morrow KM, Fiore CL, Lesser MP. 2016. Environmental drivers of microbial  
833 community shifts in the giant barrel sponge, *Xestospongia muta*, over a shallow to  
834 mesophotic depth gradient. *Environ Microbiol* 18:2025-38.
- 835 39. Webster NS, Reusch TBH. 2017. Microbial contributions to the persistence of coral  
836 reefs. *ISME J* 11:2167-2174.
- 837 40. Nguyen MT, Liu M, Thomas T. 2014. Ankyrin-repeat proteins from sponge  
838 symbionts modulate amoebal phagocytosis. *Mol Ecol* 23:1635-45.
- 839 41. Wiens M, Korzhev M, Krasko A, Thakur NL, Perovic-Ottstadt S, Breter HJ, Ushijima  
840 H, Diehl-Seifert R, Muller IM, Muller WEG. 2005. Innate immune defense of the  
841 sponge *Suberites domuncula* against bacteria involves a MyD88-dependent  
842 signaling pathway - Induction of a perforin-like molecule. *Journal of Biological*  
843 *Chemistry* 280:27949-27959.
- 844 42. Fan L, Reynolds D, Liu M, Stark M, Kjelleberg S, Webster NS, Thomas T. 2012.  
845 Functional equivalence and evolutionary convergence in complex communities of  
846 microbial sponge symbionts. *Proceedings of the National Academy of Sciences of*  
847 *the United States of America* 109:E1878-E1887.

- 848 43. Reveillaud J, Maignien L, Eren AM, Huber JA, Apprill A, Sogin ML, Vanreusel A. 2014.  
849 Host-specificity among abundant and rare taxa in the sponge microbiome. *Isme*  
850 *Journal* 8:1198-1209.
- 851 44. Burgsdorf I, Erwin PM, Lopez-Legentil S, Cerrano C, Haber M, Frenk S, Steindler L.  
852 2014. Biogeography rather than association with cyanobacteria structures  
853 symbiotic microbial communities in the marine sponge *Petrosia ficiformis*.  
854 *Frontiers in Microbiology* 5.
- 855 45. Gao ZM, Wang Y, Tian RM, Wong YH, Batang ZB, Al-Suwailem AM, Bajic VB, Qian  
856 PY. 2014. Symbiotic Adaptation Drives Genome Streamlining of the Cyanobacterial  
857 Sponge Symbiont "Candidatus *Synechococcus spongiarum*". *Mbio* 5.
- 858 46. Lo WS, Huang YY, Kuo CH. 2016. Winding paths to simplicity: genome evolution in  
859 facultative insect symbionts. *Fems Microbiology Reviews* 40:855-874.
- 860 47. Moran NA, McCutcheon JP, Nakabachi A. 2008. Genomics and Evolution of  
861 Heritable Bacterial Symbionts. *Annual Review of Genetics* 42:165-190.
- 862 48. Kolman MA, Nishi CN, Perez-Cenci M, Salerno GL. 2015. Sucrose in cyanobacteria:  
863 from a salt-response molecule to play a key role in nitrogen fixation. *Life (Basel)*  
864 5:102-26.
- 865 49. Curatti L, Giarrocco LE, Cumino AC, Salerno GL. 2008. Sucrose synthase is involved  
866 in the conversion of sucrose to polysaccharides in filamentous nitrogen-fixing  
867 cyanobacteria. *Planta* 228:617-625.
- 868 50. Blumwald E, Telor E. 1982. Osmoregulation and Cell Composition in Salt-  
869 Adaptation of *Nostoc-Muscorum*. *Archives of Microbiology* 132:168-172.
- 870 51. Desplats P, Folco E, Salerno GL. 2005. Sucrose may play an additional role to that  
871 of an osmolyte in *Synechocystis* sp PCC 6803 salt-shocked cells. *Plant Physiology*  
872 *and Biochemistry* 43:133-138.
- 873 52. Ran L, Larsson J, Vigil-Stenman T, Nylander JA, Ininbergs K, Zheng WW, Lapidus A,  
874 Lowry S, Haselkorn R, Bergman B. 2010. Genome erosion in a nitrogen-fixing  
875 vertically transmitted endosymbiotic multicellular cyanobacterium. *PLoS One*  
876 5:e11486.
- 877 53. Akman L, Yamashita A, Watanabe H, Oshima K, Shiba T, Hattori M, Aksoy S. 2002.  
878 Genome sequence of the endocellular obligate symbiont of tsetse flies,  
879 *Wigglesworthia glossinidia*. *Nat Genet* 32:402-7.
- 880 54. Frank AC. 2019. Molecular host mimicry and manipulation in bacterial symbionts.  
881 *FEMS Microbiol Lett* 366.
- 882 55. Taylor MW, Radax R, Steger D, Wagner M. 2007. Sponge-associated  
883 microorganisms: evolution, ecology, and biotechnological potential. *Microbiol Mol*

- 884 Biol Rev 71:295-347.
- 885 56. Wilkinson CR. 1983. Net primary productivity in coral reef sponges. Science  
886 219:410-2.
- 887 57. Wang JT, Hsu CM, Kuo CY, Meng PJ, Kao SJ, Chen CA. 2015. Physiological  
888 Outperformance at the Morphologically-Transformed Edge of the  
889 Cyanobacteriosponge *Terpios hoshinota* (Suberitidae: Hadromerida) when  
890 Confronting Opponent Corals. Plos One 10.
- 891 58. Zhang F, Blasiak LC, Karolin JO, Powell RJ, Geddes CD, Hill RT. 2015. Phosphorus  
892 sequestration in the form of polyphosphate by microbial symbionts in marine  
893 sponges. Proceedings of the National Academy of Sciences of the United States of  
894 America 112:4381-4386.
- 895 59. Colman AS. 2015. Sponge symbionts and the marine P cycle. Proceedings of the  
896 National Academy of Sciences of the United States of America 112:4191-4192.
- 897 60. Utami RT, Zamani NP, Madduppa HH. 2018. Molecular identification, abundance  
898 and distribution of the coral-killing sponge *Terpios hoshinota* in Bengkulu and  
899 Seribu Islands, Indonesia. Biodiversitas Journal of Biological Diversity 19:2238-  
900 2246.
- 901 61. Bryan PG. 1973. Growth rate, toxicity and distribution of the encrusting sponge  
902 *Terpios* sp.(Hadromerida: Suberitidae) in Guam, Mariana Islands. Micronesica  
903 9:237-242.
- 904 62. Thinesh T, Meenatchi R, Lipton AN, Anandham R, Jose PA, Tang SL, Seghal Kiran G,  
905 Selvin J. 2020. Metagenomic sequencing reveals altered bacterial abundance  
906 during coral-sponge interaction: Insights into the invasive process of coral-killing  
907 sponge *Terpios hoshinota*. Microbiol Res 240:126553.
- 908 63. Teruya T, Nakagawa S, Koyama T, Arimoto H, Kita M, Uemura D. 2004. Nakiterpiosin  
909 and nakiterpiosinone, novel cytotoxic C-nor-D-homosteroids from the Okinawan  
910 sponge *Terpios hoshinota*. Tetrahedron 60:6989-6993.
- 911 64. Teruya T, Nakagawa S, Koyama T, Suenaga K, Uemura D. 2002. Terpiodiene: A novel  
912 tricyclic alcohol from the Okinawan sponge *Terpios hoshinota*. Chemistry Letters  
913 doi:DOI 10.1246/cl.2002.38:38-39.
- 914 65. Fagundes MB, Falk RB, Facchi MMX, Vendruscolo RG, Maroneze MM, Zepka LQ,  
915 Jacob-Lopes E, Wagner R. 2019. Insights in cyanobacteria lipidomics: A sterols  
916 characterization from *Phormidium autumnale* biomass in heterotrophic cultivation.  
917 Food Research International 119:777-784.
- 918 66. Lane D. 1991. 16S/23S rRNA sequencing. Nucleic acid techniques in bacterial  
919 systematics:115-175.

- 920 67. Schloss PD, Westcott SL, Ryabin T, Hall JR, Hartmann M, Hollister EB, Lesniewski RA,  
921 Oakley BB, Parks DH, Robinson CJ, Sahl JW, Stres B, Thallinger GG, Van Horn DJ,  
922 Weber CF. 2009. Introducing mothur: Open-Source, Platform-Independent,  
923 Community-Supported Software for Describing and Comparing Microbial  
924 Communities. *Applied and Environmental Microbiology* 75:7537-7541.
- 925 68. Edgar RC. 2010. Search and clustering orders of magnitude faster than BLAST.  
926 *Bioinformatics* 26:2460-2461.
- 927 69. Edgar RC. 2013. UPARSE: highly accurate OTU sequences from microbial amplicon  
928 reads. *Nature Methods* 10:996-+.
- 929 70. Yilmaz P, Parfrey LW, Yarza P, Gerken J, Pruesse E, Quast C, Schweer T, Peplies J,  
930 Ludwig W, Glockner FO. 2014. The SILVA and "All-species Living Tree Project (LTP)"  
931 taxonomic frameworks. *Nucleic Acids Research* 42:D643-D648.
- 932 71. Bolyen E, Rideout JR, Dillon MR, Bokulich N, Abnet CC, Al-Ghalith GA, Alexander H,  
933 Alm EJ, Arumugam M, Asnicar F, Bai Y, Bisanz JE, Bittinger K, Brejnrod A, Brislawn  
934 CJ, Brown CT, Callahan BJ, Caraballo-Rodriguez AM, Chase J, Cope EK, Da Silva R,  
935 Diener C, Dorrestein PC, Douglas GM, Durall DM, Duvallet C, Edwardson CF, Ernst  
936 M, Estaki M, Fouquier J, Gauglitz JM, Gibbons SM, Gibson DL, Gonzalez A, Gorlick  
937 K, Guo JR, Hillmann B, Holmes S, Holste H, Huttenhower C, Huttley GA, Janssen S,  
938 Jarmusch AK, Jiang LJ, Kaehler BD, Bin Kang K, Keefe CR, Keim P, Kelley ST, Knights  
939 D, et al. 2019. Reproducible, interactive, scalable and extensible microbiome data  
940 science using QIIME 2. *Nature Biotechnology* 37:852-857.
- 941 72. Chaumeil PA, Mussig AJ, Hugenholtz P, Parks DH. 2020. GTDB-Tk: a toolkit to  
942 classify genomes with the Genome Taxonomy Database. *Bioinformatics* 36:1925-  
943 1927.
- 944 73. Bolger AM, Lohse M, Usadel B. 2014. Trimmomatic: a flexible trimmer for Illumina  
945 sequence data. *Bioinformatics* 30:2114-2120.
- 946 74. Walker BJ, Abeel T, Shea T, Priest M, Abouelliel A, Sakthikumar S, Cuomo CA, Zeng  
947 Q, Wortman J, Young SK, Earl AM. 2014. Pilon: an integrated tool for  
948 comprehensive microbial variant detection and genome assembly improvement.  
949 *PLoS One* 9:e112963.
- 950 75. Seemann T. 2014. Prokka: rapid prokaryotic genome annotation. *Bioinformatics*  
951 30:2068-9.
- 952 76. Tatusov RL, Galperin MY, Natale DA, Koonin EV. 2000. The COG database: a tool for  
953 genome-scale analysis of protein functions and evolution. *Nucleic Acids Research*  
954 28:33-36.
- 955 77. Kanehisa M, Goto S. 2000. KEGG: Kyoto Encyclopedia of Genes and Genomes.

- 956 Nucleic Acids Research 28:27-30.
- 957 78. Kanehisa M, Sato Y, Morishima K. 2016. BlastKOALA and GhostKOALA: KEGG Tools  
958 for Functional Characterization of Genome and Metagenome Sequences. Journal  
959 of Molecular Biology 428:726-731.
- 960 79. Hyatt D, Chen GL, LoCascio PF, Land ML, Larimer FW, Hauser LJ. 2010. Prodigal:  
961 prokaryotic gene recognition and translation initiation site identification. BMC  
962 Bioinformatics 11.
- 963 80. Joel A Boyd, BJW, GWT. 2019. Comparative genomics using EnrichM. In  
964 preparation.
- 965 81. Kanehisa M, Sato Y. 2020. KEGG Mapper for inferring cellular functions from  
966 protein sequences. Protein Science 29:28-35.
- 967 82. Camacho C, Coulouris G, Avagyan V, Ma N, Papadopoulos J, Bealer K, Madden TL.  
968 2009. BLAST plus : architecture and applications. BMC Bioinformatics 10.
- 969 83. Elbourne LDH, Tetu SG, Hassan KA, Paulsen IT. 2017. TransportDB 2.0: a database  
970 for exploring membrane transporters in sequenced genomes from all domains of  
971 life. Nucleic Acids Research 45:D320-D324.
- 972 84. Coordinators NR. 2018. Database resources of the National Center for  
973 Biotechnology Information. Nucleic Acids Res 46:D8-D13.
- 974 85. Edgar RC. 2004. MUSCLE: a multiple sequence alignment method with reduced  
975 time and space complexity. BMC Bioinformatics 5:113.
- 976 86. Kumar S, Stecher G, Tamura K. 2016. MEGA7: Molecular Evolutionary Genetics  
977 Analysis Version 7.0 for Bigger Datasets. Mol Biol Evol 33:1870-4.
- 978 87. Minh BQ, Schmidt HA, Chernomor O, Schrempf D, Woodhams MD, von Haeseler  
979 A, Lanfear R. 2020. IQ-TREE 2: New Models and Efficient Methods for Phylogenetic  
980 Inference in the Genomic Era. Mol Biol Evol 37:1530-1534.
- 981 88. Letunic I, Bork P. 2019. Interactive Tree Of Life (iTOL) v4: recent updates and new  
982 developments. Nucleic Acids Res 47:W256-W259.
- 983 89. Parks DH, Chuvochina M, Waite DW, Rinke C, Skarshewski A, Chaumeil PA,  
984 Hugenholtz P. 2018. A standardized bacterial taxonomy based on genome  
985 phylogeny substantially revises the tree of life. Nature Biotechnology 36:996-+.

986



## 987 **Figure legend and Table**

988 **Figure 1.** Proportions of *T. hoshinota*-associated bacterial communities across oceans.

989 *Proteobacteria* (blue) and *Cyanobacteria* (green) were the dominant groups, ranging from  
990 81.5–97.4% of community. (a) Bacterial compositions across the western Pacific Ocean,  
991 South China Sea, and Indian Ocean. Maps on the right show results in Okinawa, Japan (b),  
992 and Taiwan (c). Different colors represent different bacterial phyla. Percentage composition  
993 of phyla less than 0.05% are grouped as “Others.”

994

995 **Figure 2.** Electron micrographs of *T. hoshinota* and associated cyanobacteria.

996 (a-c, SEM; d-f, TEM). (a) Sponge covering an abiotic substratum. The sponge’s skeleton  
997 was arranged in a tangential style, and the mesohyl was supported by a tract of spicules. (b,  
998 c) Close view of the mesohyl. Numerous spheres composing the inside of the mesohyl, and  
999 cross-matched with (d); their thylakoids identified the spheres as cyanobacteria. The  
1000 detailed structures of the cyanobacteria were observed from a single cyanobacterial cell (e)  
1001 and a dividing cell (f); they included the cell wall, thylakoid, carboxysome (ca), and  
1002 nucleoid (n).

1003

1004

1005 **Figure 3.** Representation of the “Paraprochloron terpiosii LD05” genome.

1006 The genome is 3,839,796 bp. The rings from inside to outside represent GC content (black),  
1007 GC skew- (purple), GC skew + (green), coding sequence regions (blue), rRNA gene  
1008 sequences (dark green), and secondary metabolite gene clusters (red).

1009

1010 **Figure 4.** Molecular phylogenetic analyses of *Prochloron* and *Prochloron*-related bacteria.

1011 (a) Pruned phylogenetic tree based on the concatenation of 120 single-copy gene protein  
1012 sequences. The complete phylogenetic tree including other cyanobacterial genera can be  
1013 found in Supplementary figure 5. The branches with Ultrafast bootstrap (UFBoot) value  
1014 >95% are highlighted with the red. The *Prochloron* genomes are labeled with yellow, and  
1015 LD05 and SP5CPC1 are labeled with pink. *Vampirovibrio chlorellavorus* C was used as  
1016 the outgroup. (b) A phylogenetic tree was constructed using the 16S rRNA gene by the  
1017 maximum-likelihood method with 1,000 bootstraps. The tree included 16S rRNA gene  
1018 sequences from SP5CPC1, LD05, *Prochloron* genomes—including *P. didemni* P2, *P.*  
1019 *didemni* P3, and *P. didemni* P4—and other related 16S rRNA gene sequences identified by  
1020 PCR cloning from environmental samples. The 16S rRNA gene sequence of *Stanieria* sp.  
1021 NIES-3757 genome was used as an outgroup. The scare bar represents the number of  
1022 changes per nucleotide. Asterisk represents the genomes are available.

1023 **Figure 5.** Extracted ion-chromatograms (EICs) of UPLC-QTOF-MS of the extracts of *T.*  
1024 *hoshinota*. Chlorophyll *a* analytical standard (a) and chlorophyll *b* analytical standard (b)  
1025 were used in the analysis. The analysis included two *T. hoshinota* samples. EIC of MS  
1026 spectra within the *m/z* value of 893.543 (a, c, e) and 907.522 (b, d, f). a: chlorophyll *a*  
1027 peak. b: chlorophyll *b* peak.

1028

1029 **Figure 6.** Metabolic potentials and putative nutrient cycling between *T. hoshinota* and *Ca.*  
1030 *Pp. terposi* LD05.

1031 The bacterium may recycle nitrogen waste from host cells and provide them with vitamins.

1032 The bacterium may also produce secondary metabolites as toxins to help the sponge

1033 weaken coral tissues and facilitate overgrowth. On the other hand, the bacterium may also

1034 store phosphate as an energy reservoir for the holobiont to prepare for the competition with

1035 coral. Abbreviation: amt, ammonia transporter; NRT, nitrate transporter; NR, nitrate

1036 reductase; NiR, ferredoxin--nitrite reductase; CA, carbonic anhydrase; PPK,

1037 polyphosphate kinase; GS, glutamine synthetase; GOGAT, glutamine oxoglutarate

1038 aminotransferase; RuBisCo, ribulose-1,5-bisphosphate carboxylase/oxygenase; pcyA,

1039 phycocyanobilin:ferredoxin oxidoreductase; HO, heme oxygenase; pebA,

1040 dihydrobiliverdin:ferredoxin oxidoreductase; pebB, phycoerythrobilin:ferredoxin

1041 oxidoreductase. \*The structures of nakiterpiosin and nakiterpiosinone are depicted based  
1042 on Shuanhu Gao et al (2012).

1043

1044 **Table 1.** Basic statistics of the *Candidatus* Paraprochloron terpiosii LD05

1045

## 1046 **Supplemental Materials**

1047 **Figure S1.** Alpha diversity plots of each sample from different locations. (a) OTU richness  
1048 estimated by Chao1. (b) Faith's Phylogenetic Diversity. (c) Shannon's evenness index box  
1049 plot. The lines extending outside the boxes indicate variability outside the upper and lower  
1050 quartiles.

1051

1052 **Figure S2.** PCA visualizations and dendrograms of beta diversity analysis. PCA  
1053 visualizations (a–c) and dendrograms (d–f) of beta diversity analysis using the Bray–  
1054 Curtis metric (a and d), unweighted (qualitative) UniFrac (b and e), and weighted  
1055 (quantitative) UniFrac (c and f).

1056

1057 **Figure S3.** Taxonomic compositions of the *T. hoshinota* microbiome from different  
1058 locations at the phylum (a) and genus (b) levels based on 16S rRNA amplicon sequencing  
1059 analysis.

1060

1061 **Figure S4.** Matrix of average amino acid identity between cyanobacteria that are closely  
1062 related to the LD05 genome. The dendrogram was generated using the neighbor joining  
1063 method.

1064

1065 **Figure S5.** Complete phylogenetic tree of Figure 4a. The tree includes 120 cyanobacteria  
1066 from different genera. The branches with Ultrafast bootstrap (UFBoot) value >95% are  
1067 highlighted with the red. The *Prochloron* genomes are labeled with yellow, and LD05 and  
1068 SP5CPC1 are labeled with pink. *Vamprovibrio chlorellavorus* C was used as the  
1069 outgroup.

1070

1071 **Figure S6.** Heatmap representing the relative abundance of genes assigned to COG  
1072 functional categories. The analysis included SP5CPC1, LD05, *Prochloron*, and the  
1073 members in the adjacent clade. The dendrogram was draw using complete-linkage  
1074 clustering.

1075 **Table S1.** Summary of information on sampling and reads

1076

1077 **Table S2.** Proportion of different cyanobacterial genera in *T. hoshinota*-associated

1078 cyanobacteria

1079

1080 **Table S3.** Genomic features of LD05, *Prochloron*, and other phylogenetically-close

1081 cyanobacteria

1082

1083 **Table S4.** Comparison of metabolic feature in “Paraprochloron” and *Prochloron*

1084

# Figure 1

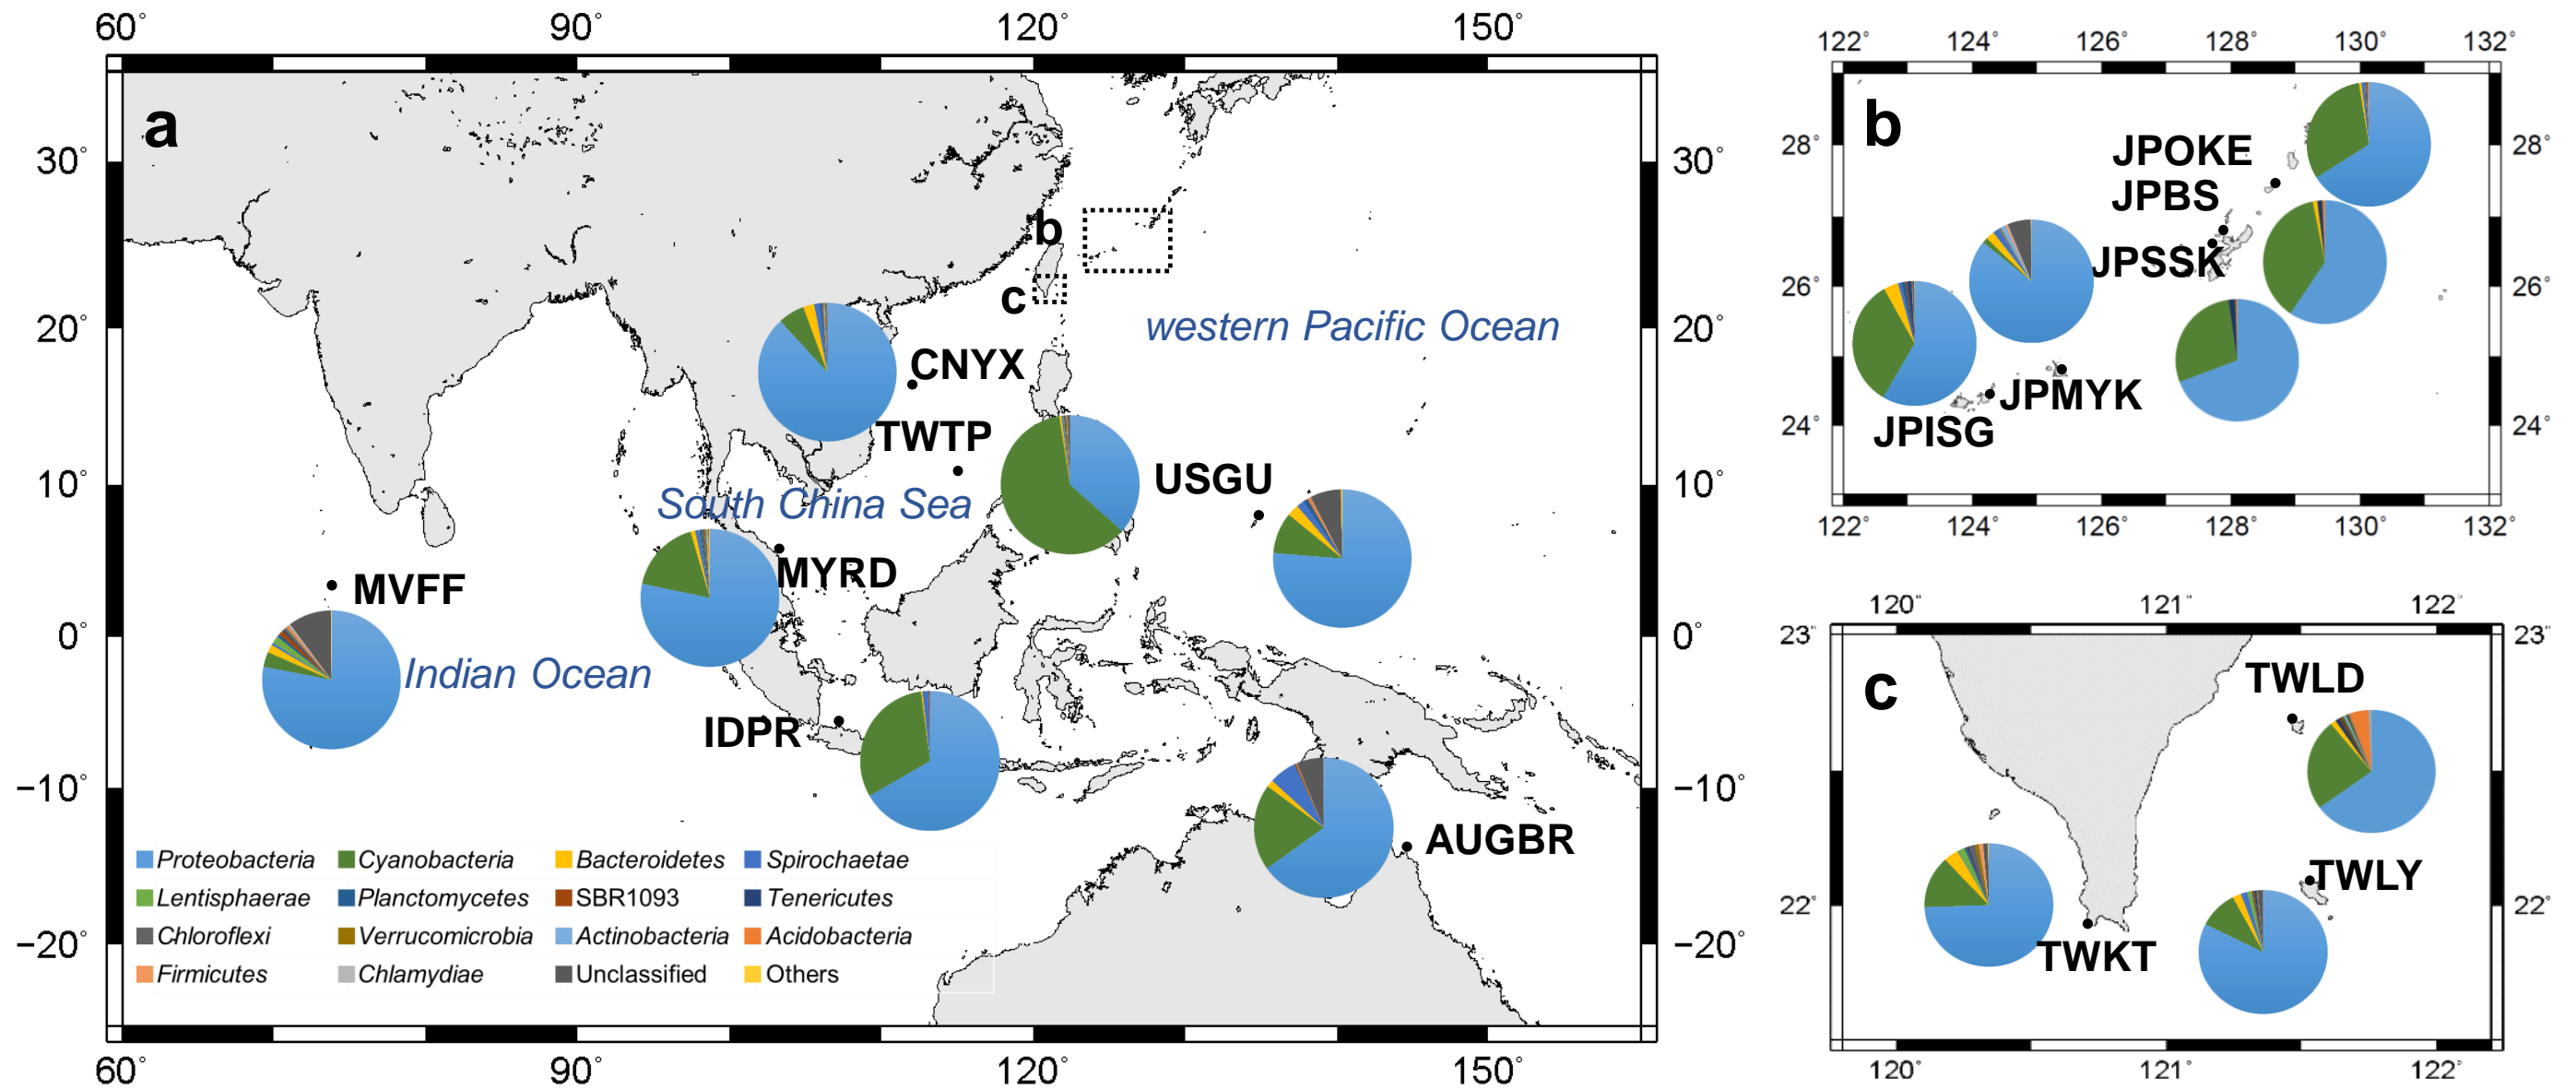

**Figure 2**

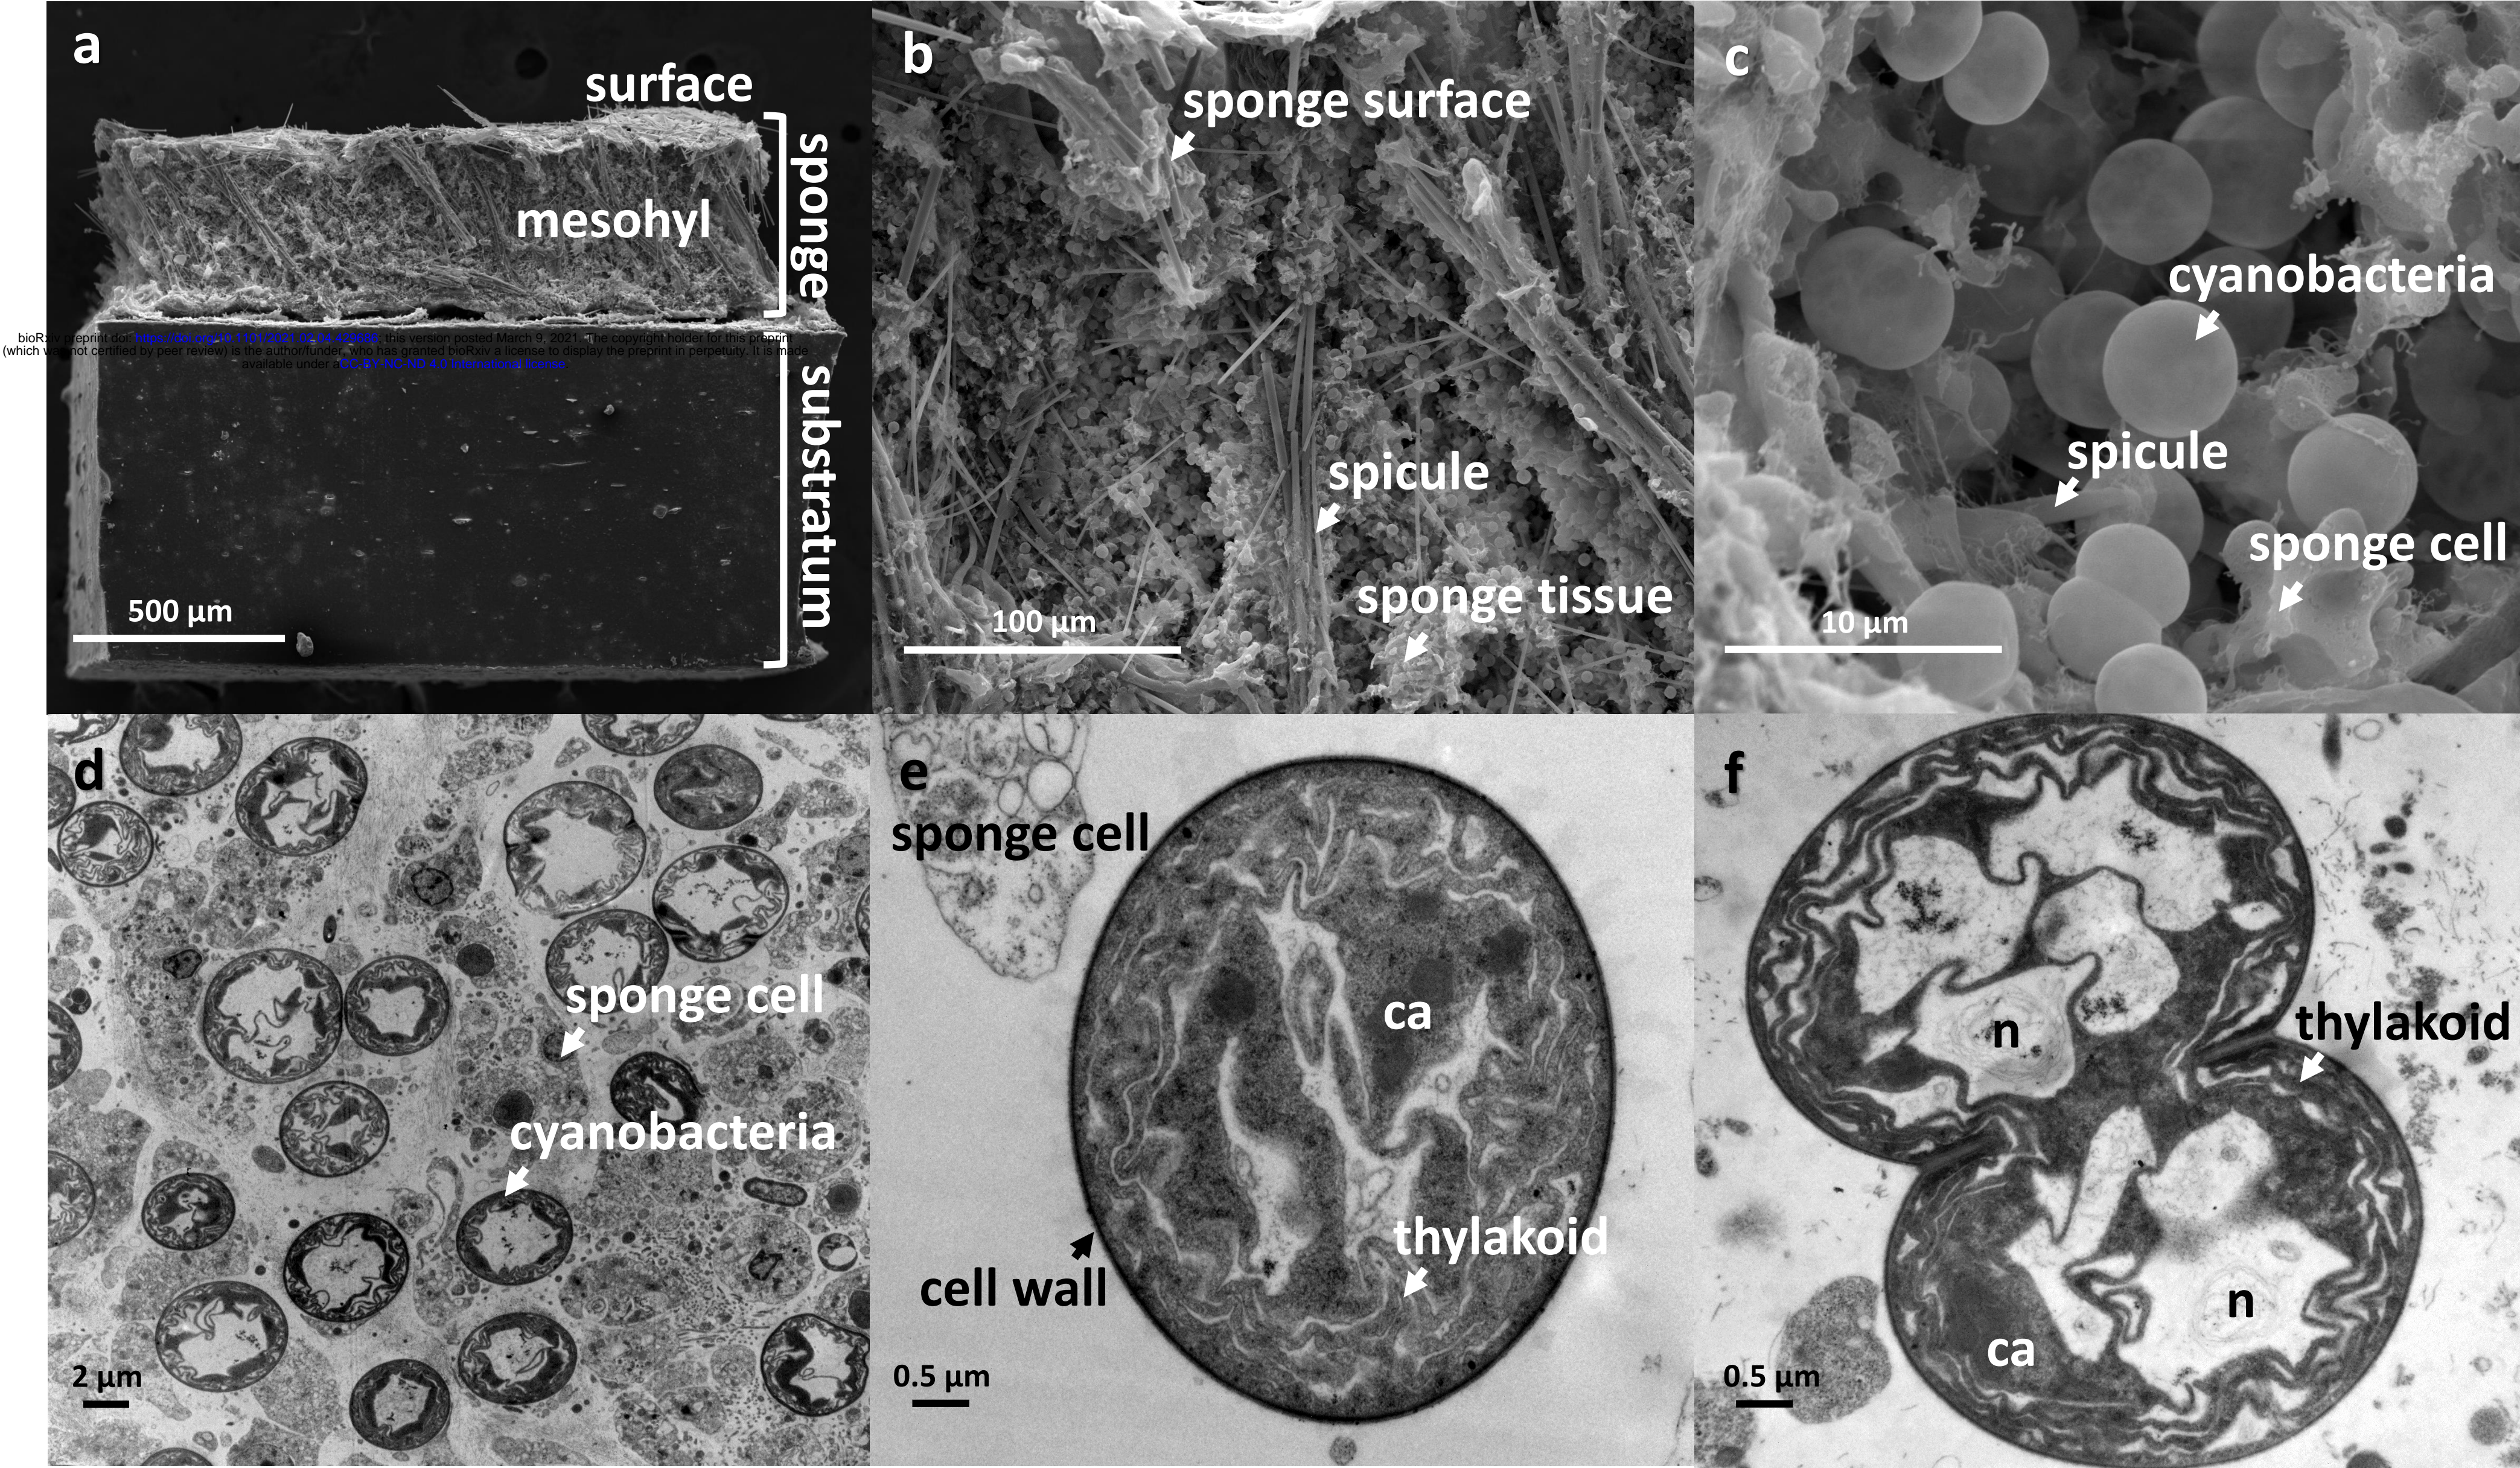



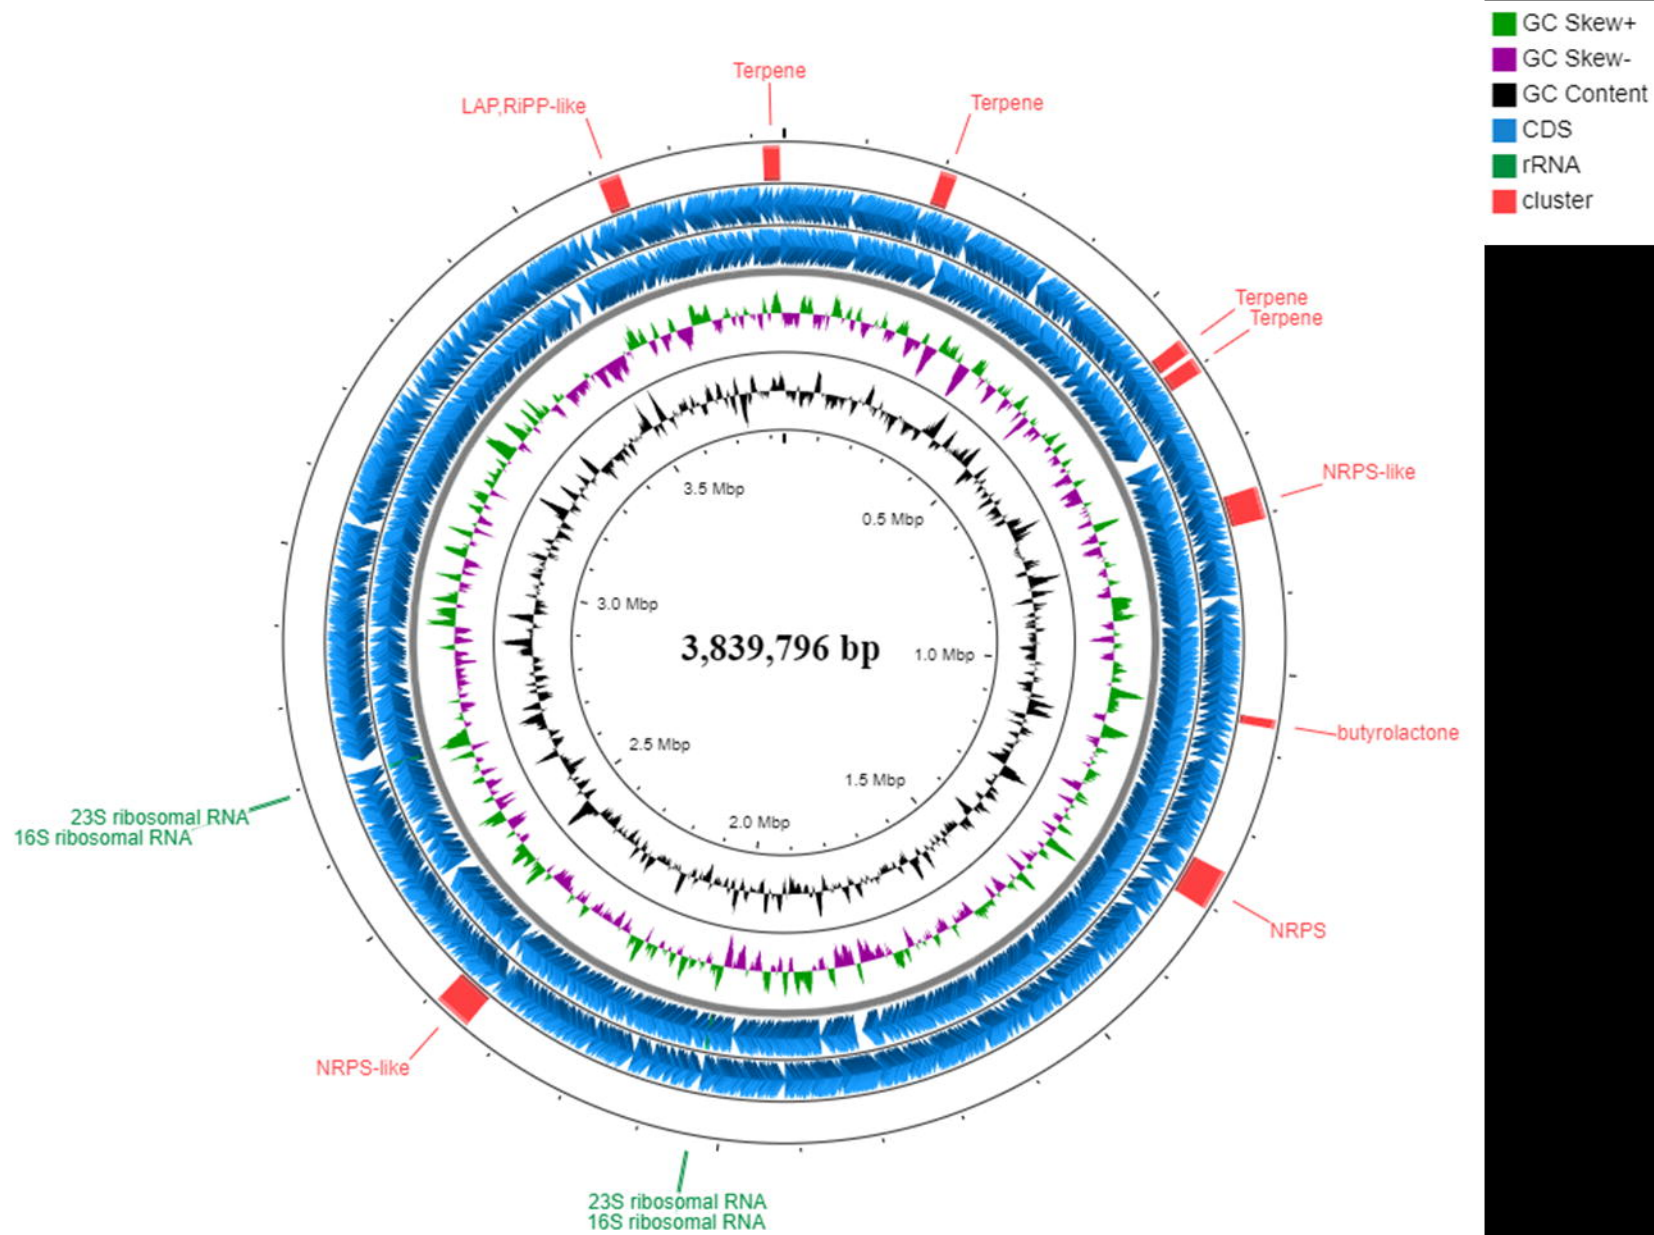

**"Paraprochloron terpiosii LD05"**

# Figure 4

**a**

Tree scale: 0.1

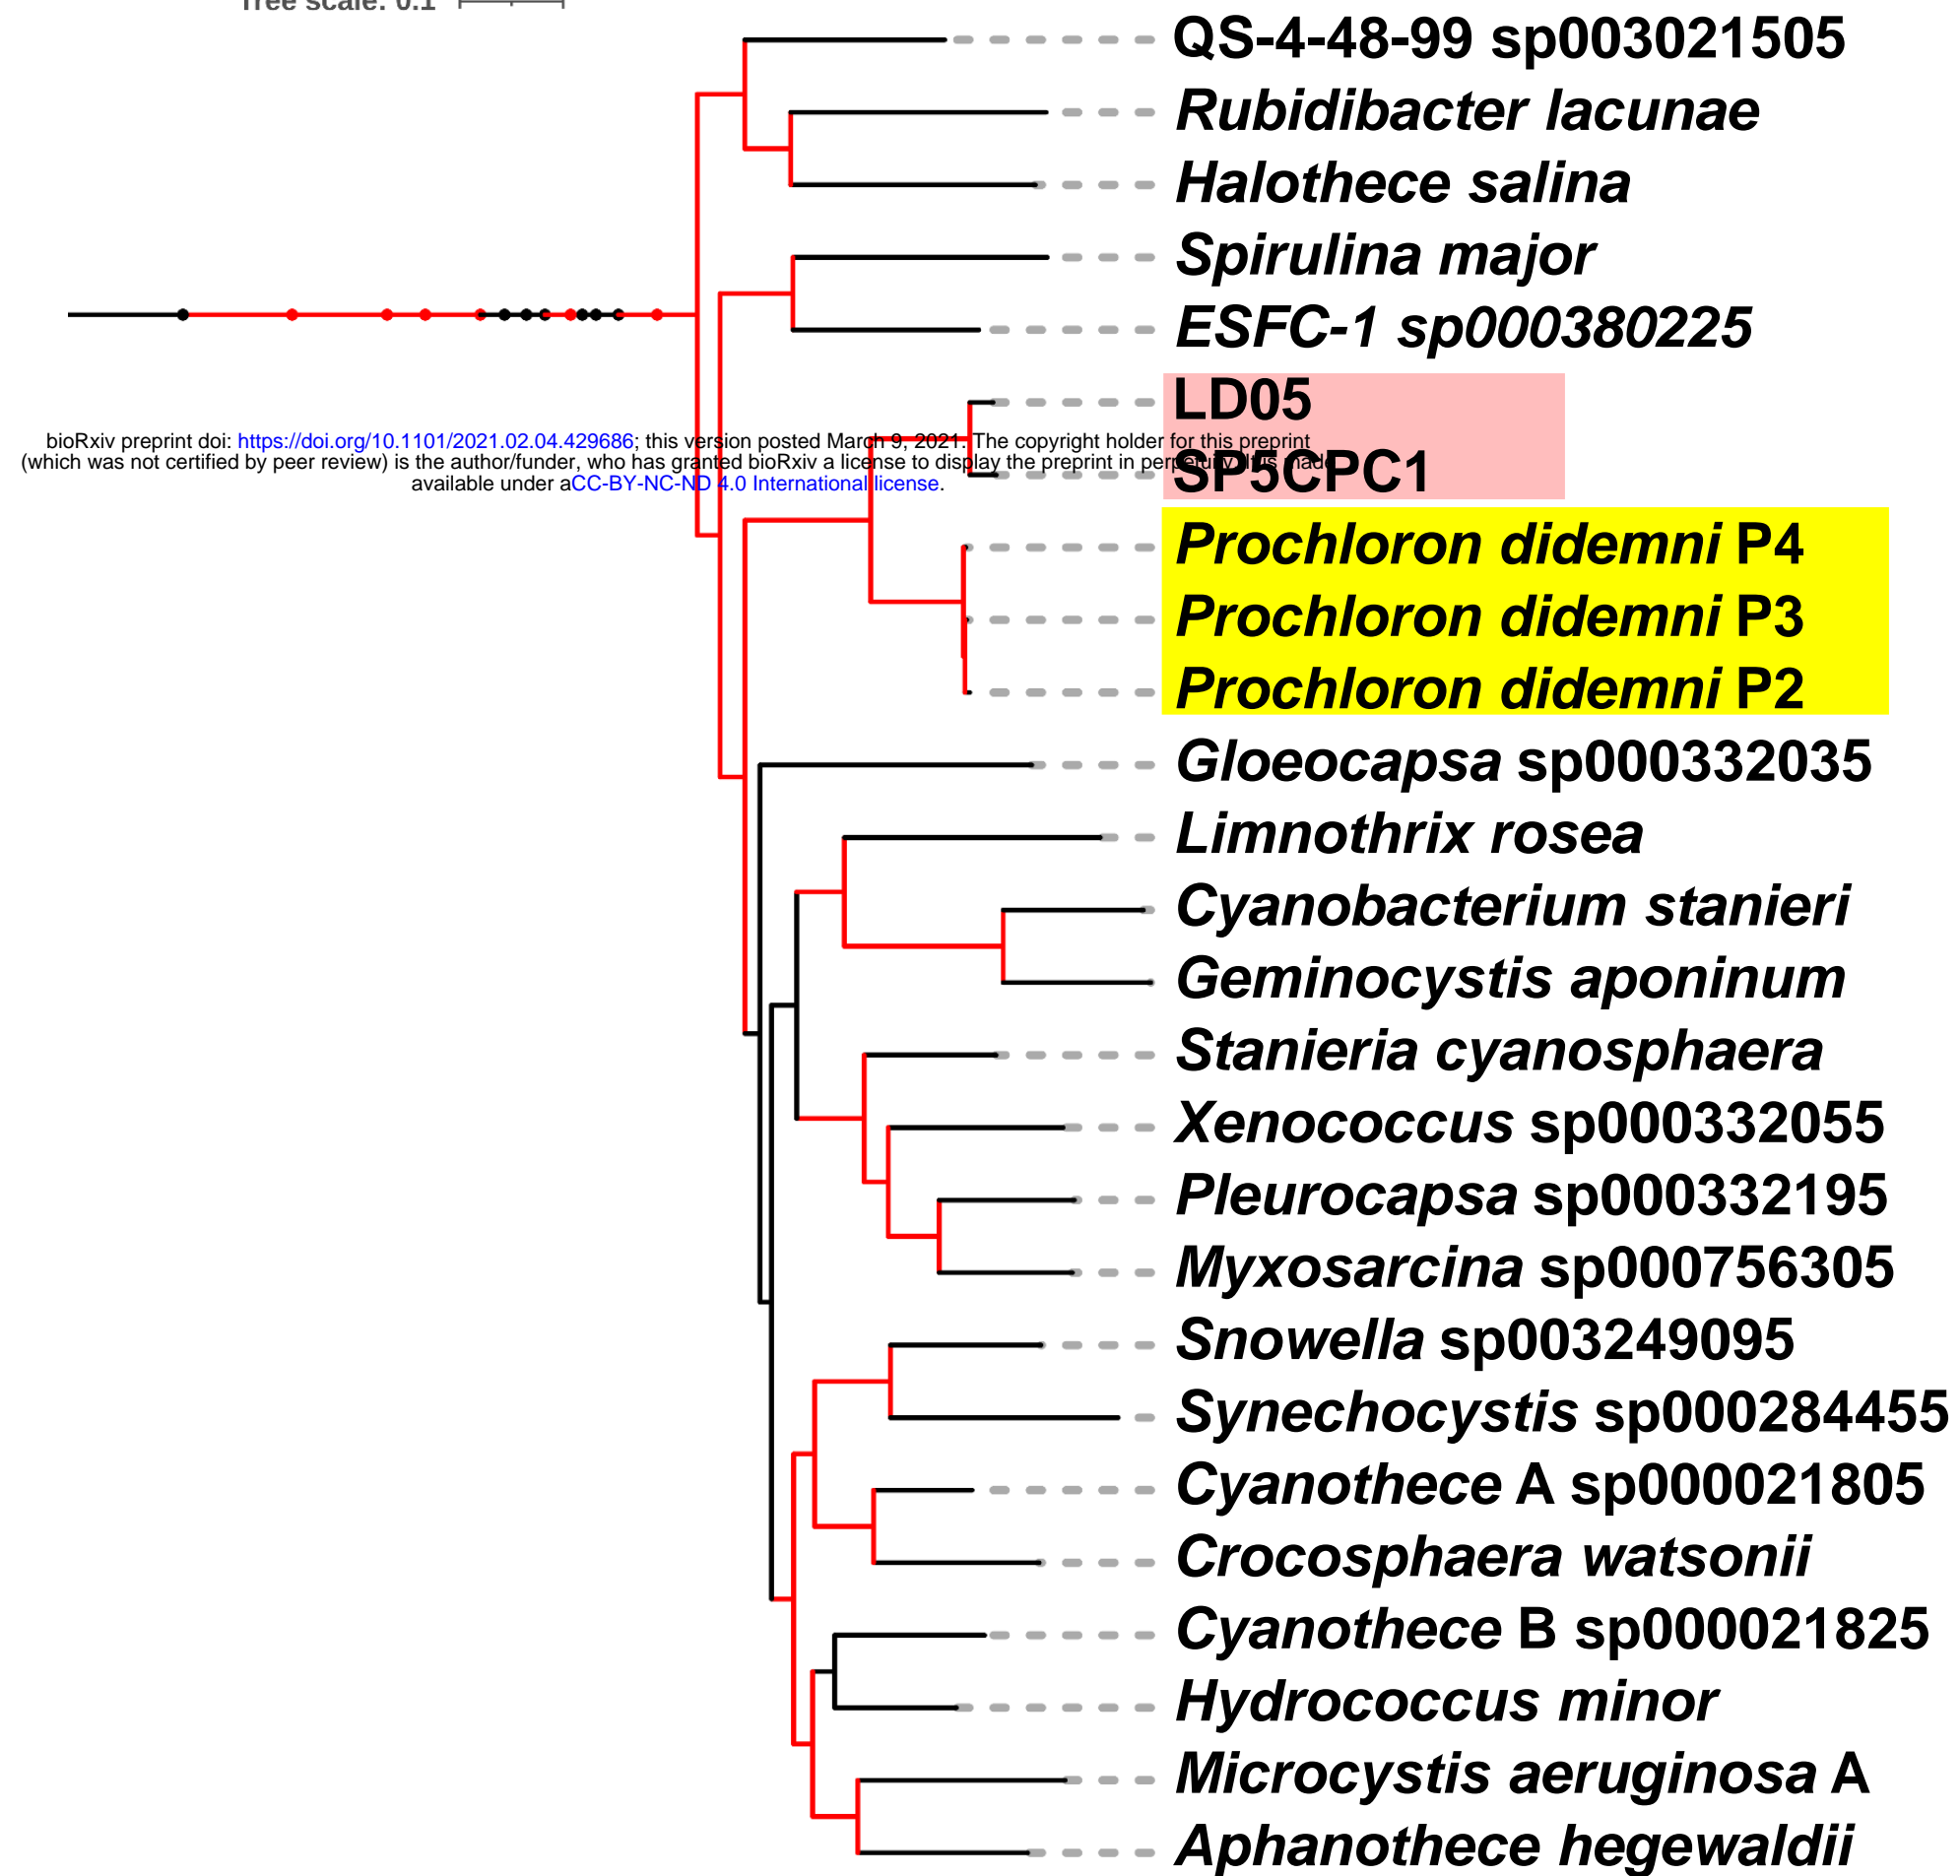

**b**

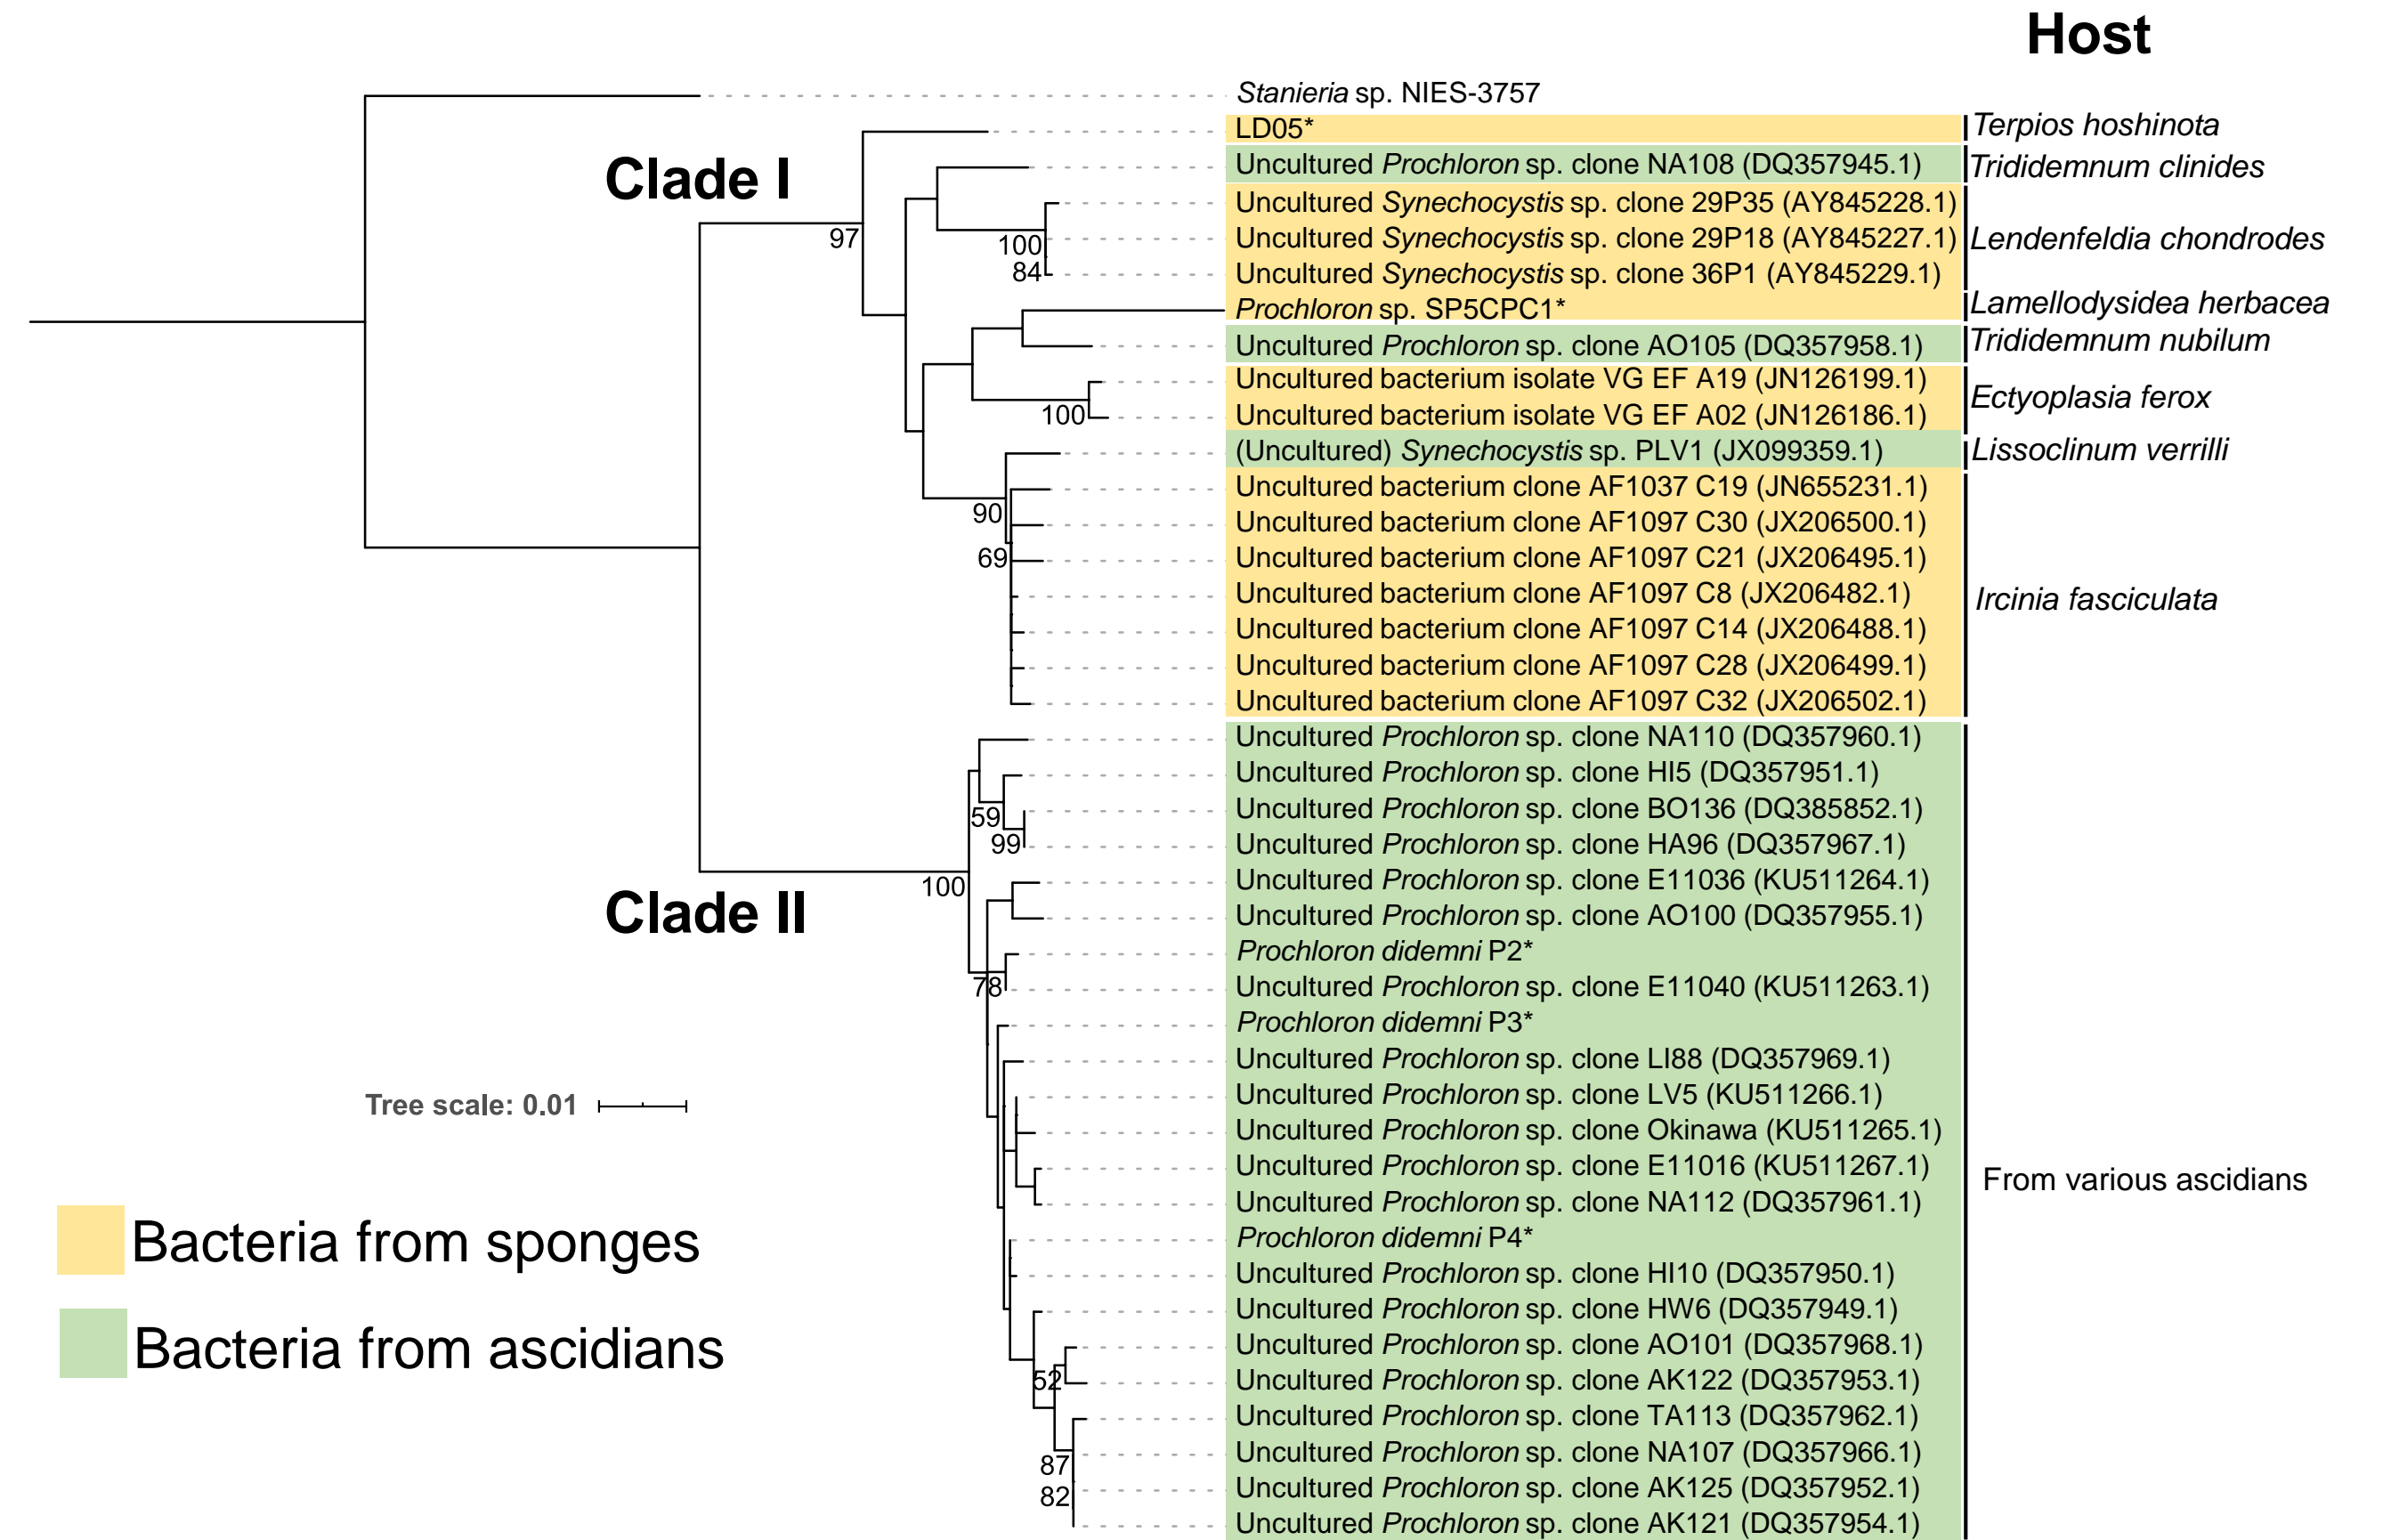

# Figure 5

bioRxiv preprint doi: <https://doi.org/10.1101/2021.02.04.429686>; this version posted March 9, 2021. The copyright holder for this preprint (which was not certified by peer review) is the author/funder, who has granted bioRxiv a license to display the preprint in perpetuity. It is made available under aCC-BY-NC-ND 4.0 International license.

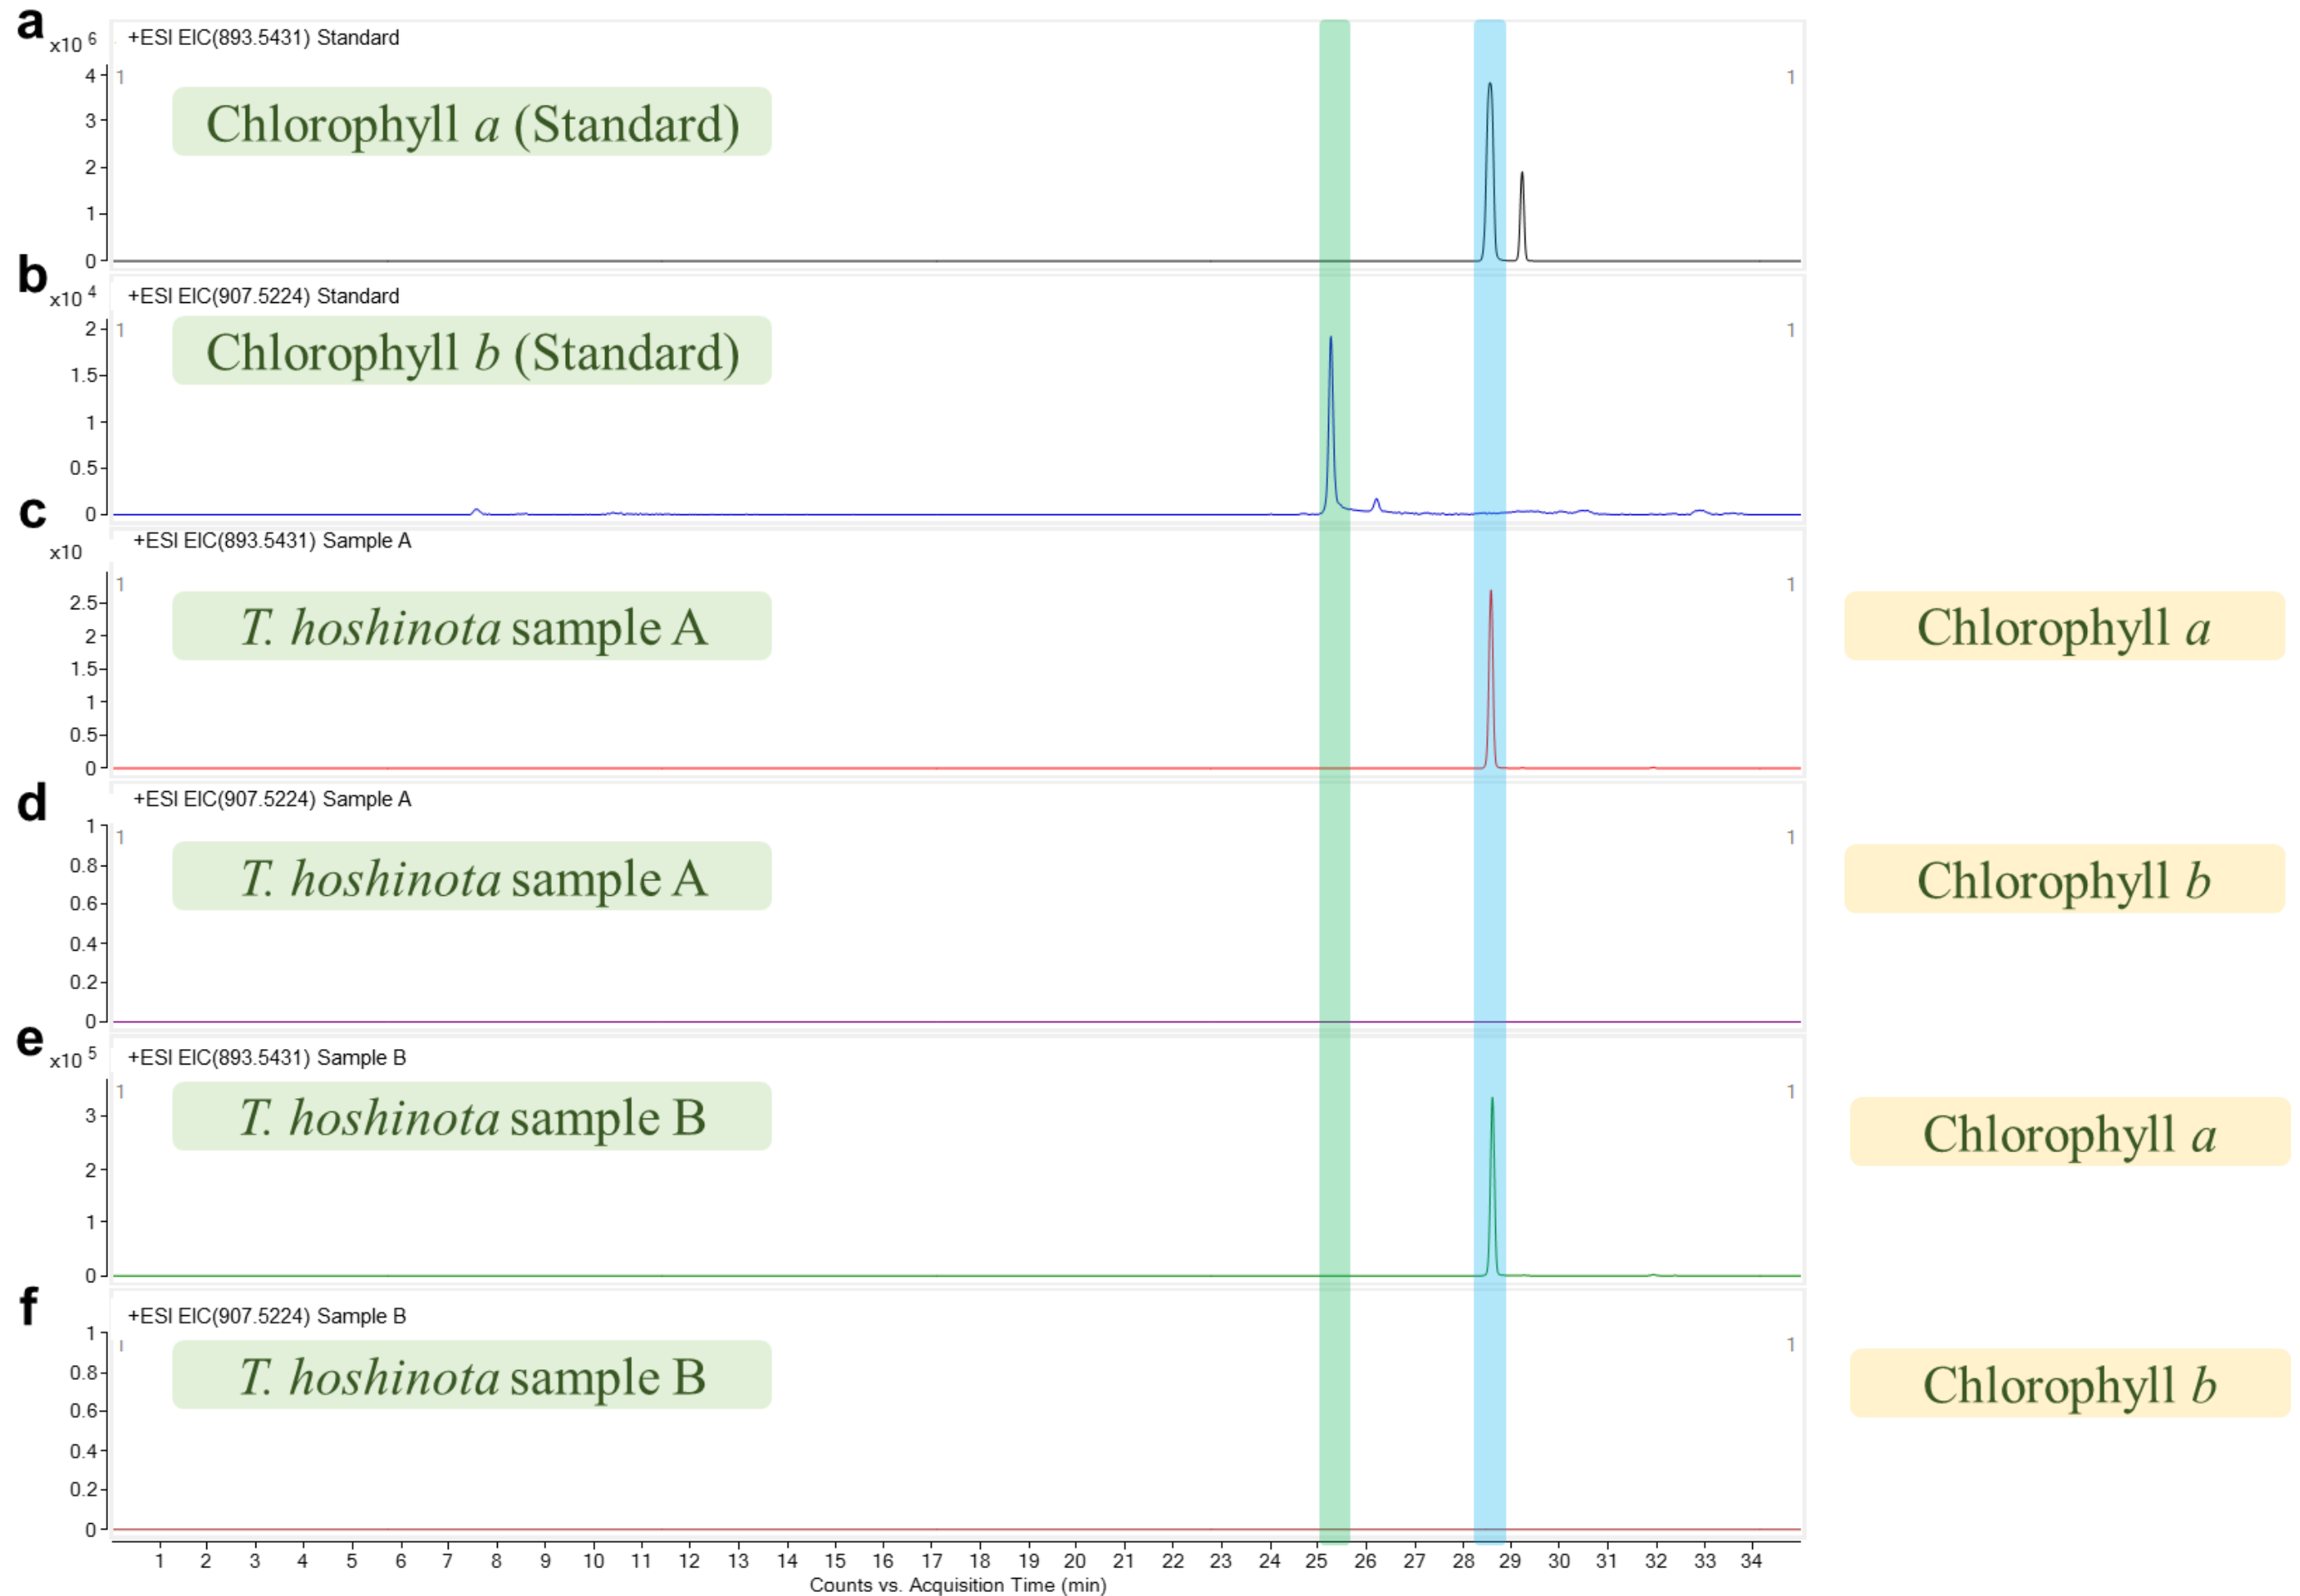

Figure 6

Mesohyl of *Terpios hoshinota*

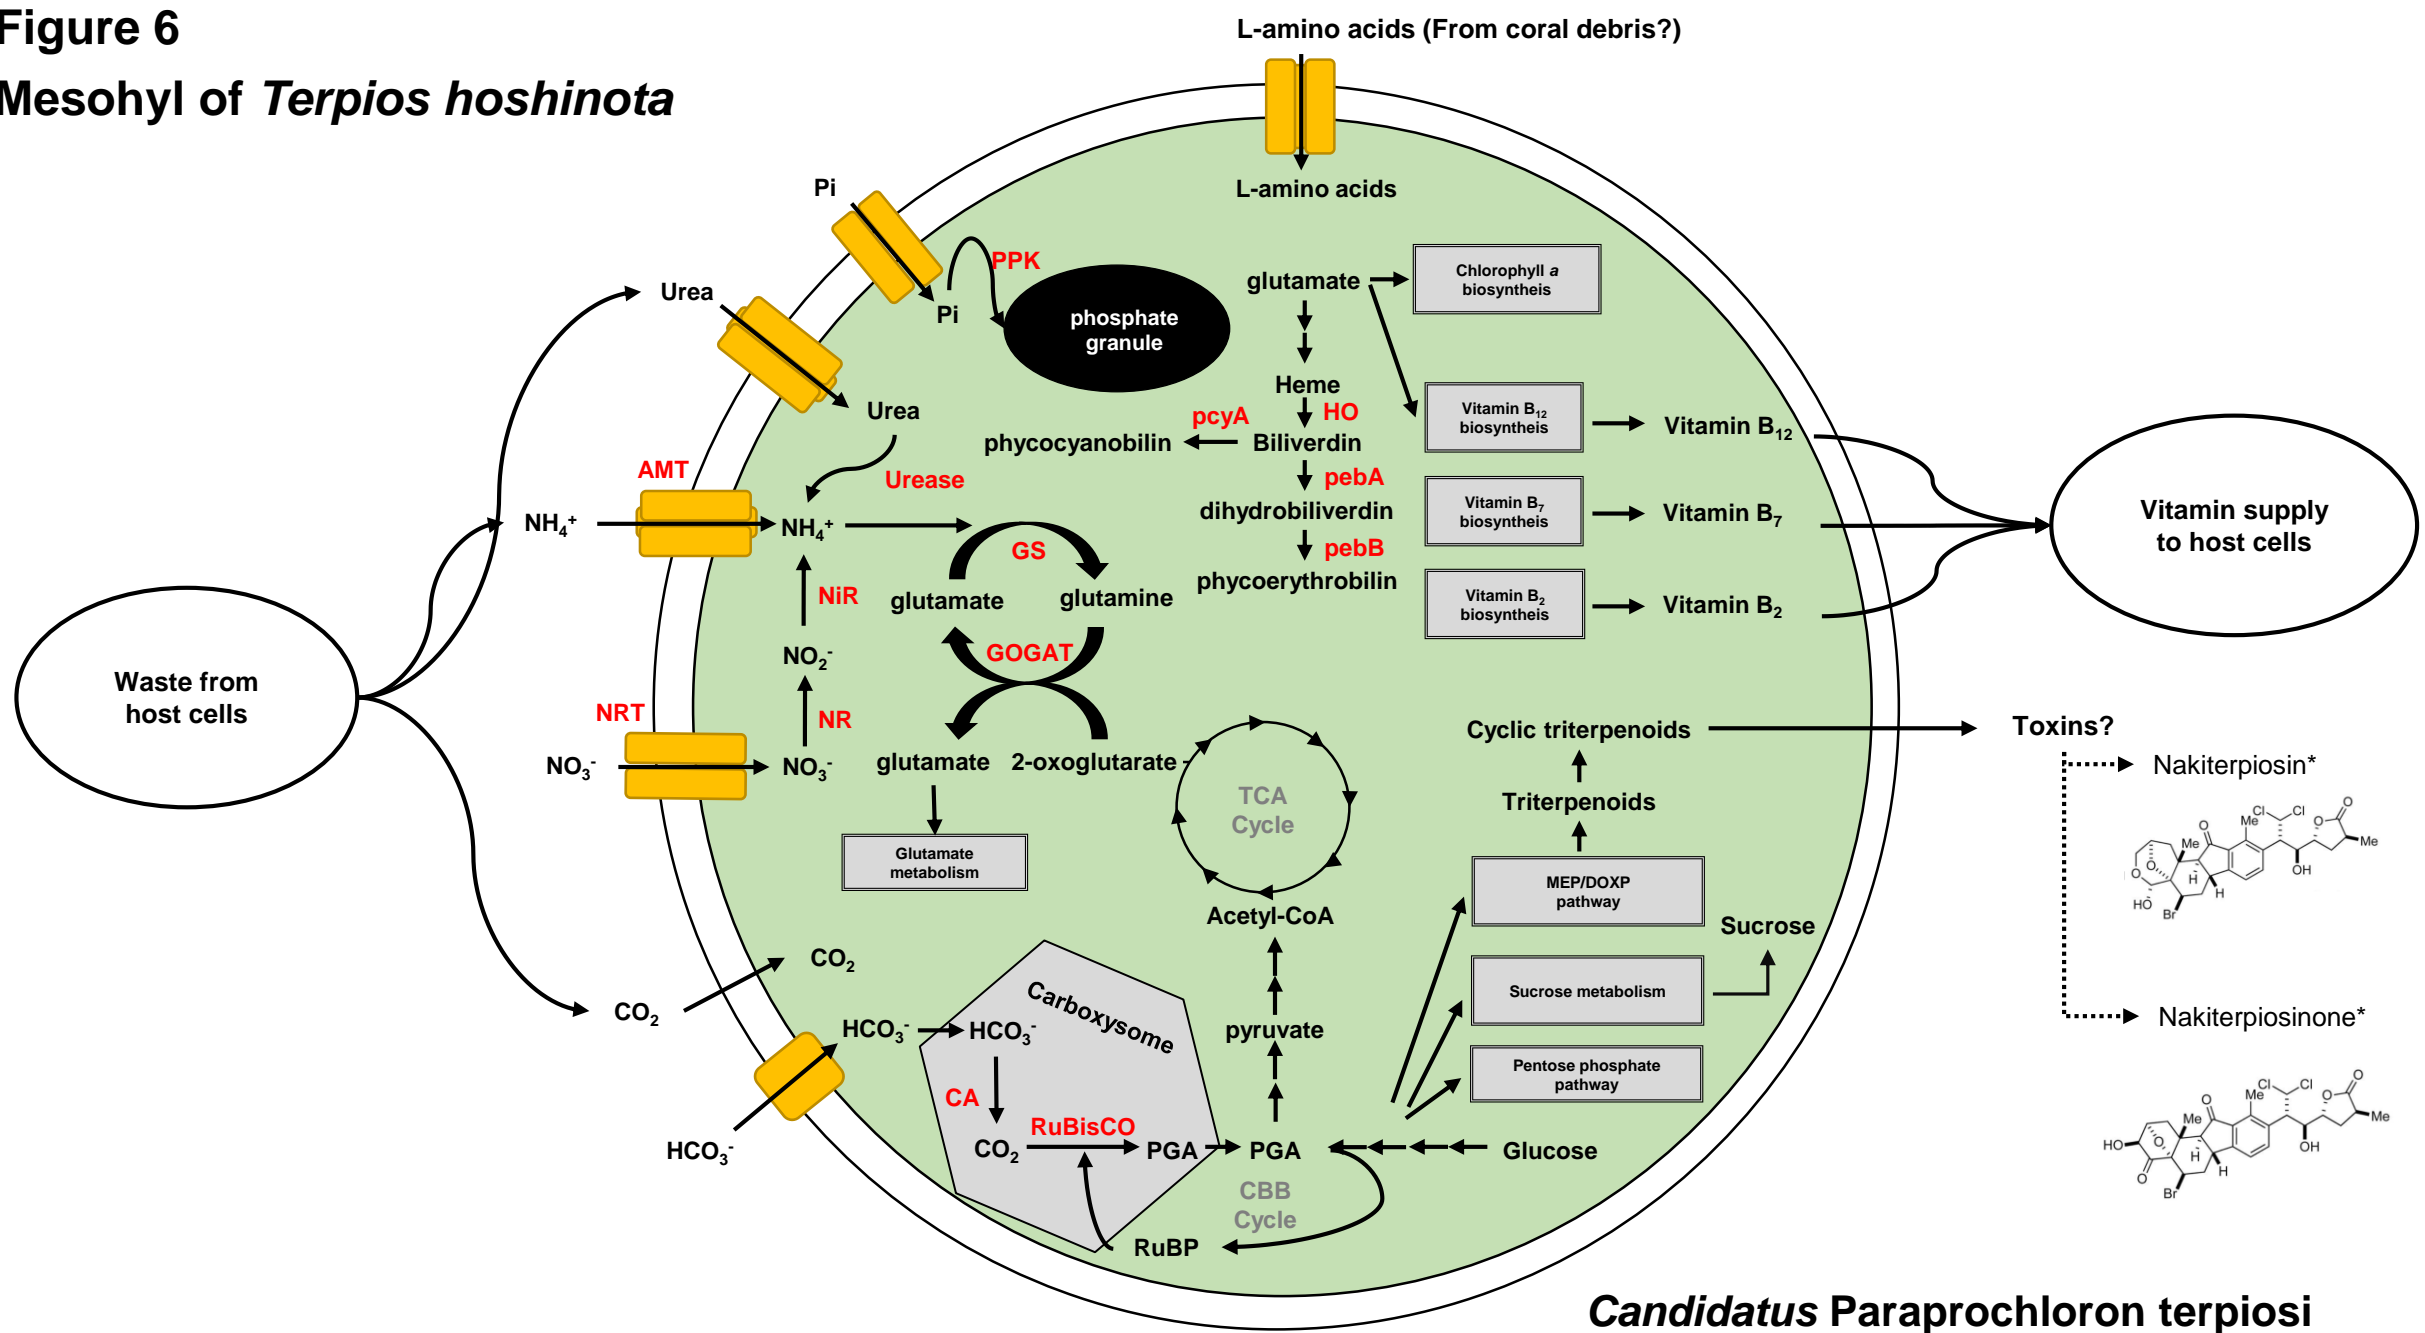

*Candidatus* Paraprochloron terpios
